# Supplementary material for: Machine Learning vs. Economic Restrictions: Evidence from Stock Return Predictability
Source: Atypon-hosted journal article supplement (doi:10.1287/mnsc.2022.4449), 2022-06-29
Supplement: mnsc.2022.4449.sm1.pdf [file mnsc.2022.4449.sm1.pdf]

# **Internet Appendix to**

## **Machine Learning versus Economic Restrictions:**

### **Evidence from Stock Return Predictability**

Doron Avramov, Si Cheng, and Lior Metzker

This Internet Appendix presents additional empirical results. Most of the results presented here are discussed in the paper.

#### **Section 1. Data Description**

- Internet Appendix A: Variable Definitions
- Table IA1: Number of Stocks Over Time

#### **Section 2. Robustness of Performance of Machine Learning Portfolios**

- Table IA2: Portfolios Sorted by Neural Network Predicted Returns: Equal-Weighted Returns (Robustness of Table 1)
- Table IA3: Performance of Portfolios Sorted by OLS Predicted Returns and Individual Anomalies (Traditional Methods as Benchmarks)
- Table IA4: Neural Network Estimation Based on Subsamples: Equal-Weighted Returns (Robustness of Table 2)
- Table IA5: NN3-Predicted Alpha and Value-Weighted Loss Function (Robustness of Table 1)
- Table IA6: Portfolios Sorted by Risk Loadings on the Stochastic Discount Factor: Equal-Weighted Returns (Robustness of Table 3)
- Table IA7: IPCA Estimation Based on Subsamples and the Unrestricted IPCA Model (Robustness of Table 4)

#### **Section 3. Other Robustness Tests**

- Table IA8: Performance of Machine Learning Portfolios in Predictive Regressions (Robustness of Table 7)
- Table IA9: Performance of Machine Learning Portfolios and their Attribution: IPCA and Conditional Autoencoder (Robustness of Table 10)

## Internet Appendix A: Variable Definitions

| Variables                       | Definitions                                                                                                                                                                                                                                                                                                                                                                                                                                                                                                                                                                                                                                                                                                                                                                                                                                                                                                                                                                                                                                                                                                                                                                                                  |
|---------------------------------|--------------------------------------------------------------------------------------------------------------------------------------------------------------------------------------------------------------------------------------------------------------------------------------------------------------------------------------------------------------------------------------------------------------------------------------------------------------------------------------------------------------------------------------------------------------------------------------------------------------------------------------------------------------------------------------------------------------------------------------------------------------------------------------------------------------------------------------------------------------------------------------------------------------------------------------------------------------------------------------------------------------------------------------------------------------------------------------------------------------------------------------------------------------------------------------------------------------|
| <b>A. Stock Characteristics</b> |                                                                                                                                                                                                                                                                                                                                                                                                                                                                                                                                                                                                                                                                                                                                                                                                                                                                                                                                                                                                                                                                                                                                                                                                              |
| Log(Price)                      | The logarithm of stock price as reported in CRSP.                                                                                                                                                                                                                                                                                                                                                                                                                                                                                                                                                                                                                                                                                                                                                                                                                                                                                                                                                                                                                                                                                                                                                            |
| Log(Size)                       | The logarithm of stock market capitalization, computed as the number of common shares outstanding times share price as reported in CRSP.                                                                                                                                                                                                                                                                                                                                                                                                                                                                                                                                                                                                                                                                                                                                                                                                                                                                                                                                                                                                                                                                     |
| Book-to-Market                  | Book value of equity divided by the market capitalization at fiscal year-end, following Fama and French (2015).                                                                                                                                                                                                                                                                                                                                                                                                                                                                                                                                                                                                                                                                                                                                                                                                                                                                                                                                                                                                                                                                                              |
| Log(Illiquidity)                | The logarithm of the stock illiquidity, computed in a given month $t$ as follows: $ILLIQ_{i,t} = (\sum_{d \in t}  R_{i,d,t}  / VOLD_{i,d,t}) / D_{i,t} \times 10^6$ , where $R_{i,d,t}$ refers to the percentage return of stock $i$ in day $d$ of month $t$ , $VOLD_{i,d,t}$ refers to the dollar trading volume at the same time, and $D_{i,t}$ is the number of trading days for stock $i$ in month $t$ , following Amihud (2002).                                                                                                                                                                                                                                                                                                                                                                                                                                                                                                                                                                                                                                                                                                                                                                        |
| Beta                            | The beta in a given month $t$ is computed as follows: $R_{i,w,t} = \alpha_{i,t} + \beta_{i,t}MKT_{w,t} + e_{i,w,t}$ , where $R_{i,w,t}$ refers to the accumulated return of stock $i$ in week $w$ of month $t$ , and $MKT_{w,t}$ refers to the contemporaneous equal-weighted market returns. The $\beta_{i,t}$ is estimated in a three-year rolling window with at least 52 weeks of returns prior to the formation period, following Fama and MacBeth (1973).                                                                                                                                                                                                                                                                                                                                                                                                                                                                                                                                                                                                                                                                                                                                              |
| 1M Return                       | The monthly stock return as reported in CRSP.                                                                                                                                                                                                                                                                                                                                                                                                                                                                                                                                                                                                                                                                                                                                                                                                                                                                                                                                                                                                                                                                                                                                                                |
| 12M Momentum                    | Formation period return in a given month $t$ , computed as the cumulative 11-month return from month $t - 11$ to month $t - 1$ , following Jegadeesh (1990).                                                                                                                                                                                                                                                                                                                                                                                                                                                                                                                                                                                                                                                                                                                                                                                                                                                                                                                                                                                                                                                 |
| IdioVol                         | The idiosyncratic volatility for stock $i$ in month $t$ , computed as the standard deviation of the residual $e_{i,w,t}$ , where $e_{i,w,t}$ is defined as in <i>Beta</i> , following Ali, Hwang, and Trombley (2003).                                                                                                                                                                                                                                                                                                                                                                                                                                                                                                                                                                                                                                                                                                                                                                                                                                                                                                                                                                                       |
| Absolute Accruals               | The absolute value of accruals, computed in a given year $t$ as follows: $Accruals_{i,t} = (IB_{i,t} - OANCF_{i,t}) / ASSET_{i,t}$ , where $IB_{i,t}$ refers to the income before extraordinary items (COMPUSTAT annual item IB) of stock $i$ in year $t$ , $OANCF_{i,t}$ refers to the operating cash flows (item OANCF), and $ASSET_{i,t}$ refers to the average total assets (item AT) of the beginning and end of year $t$ . If $OANCF_{i,t}$ is missing, then set to $(\Delta CA_{i,t} - \Delta Cash_{i,t}) - (\Delta CL_{i,t} - \Delta STD_{i,t} - \Delta TP_{i,t}) - Dep_{i,t}$ , where $\Delta CA_{i,t}$ refers to the change in current assets (COMPUSTAT annual item ACT) of stock $i$ in year $t$ , $\Delta Cash_{i,t}$ refers to the change in cash and short-term investments (item CHE), $\Delta CL_{i,t}$ refers to the change in current liabilities (item LCT), $\Delta STD_{i,t}$ refers to the change in debt included in current liabilities (item DLC), $\Delta TP_{i,t}$ refers to the change in income taxes payable (item TXP), and $Dep_{i,t}$ refers to the depreciation and amortization expense (item DP), following Sloan (1996) and Bandyopadhyay, Huang, and Wirjanto (2010). |
| Log(Age)                        | The logarithm of the number of years since the first COMPUSTAT coverage, following Jiang, Lee, and Zhang (2005).                                                                                                                                                                                                                                                                                                                                                                                                                                                                                                                                                                                                                                                                                                                                                                                                                                                                                                                                                                                                                                                                                             |
| Asset Growth                    | Asset growth in a given year $t$ , computed as follows: $ASSETG_{i,t} = (ASSET_{i,t} - ASSET_{i,t-1}) / ASSET_{i,t-1}$ , where $ASSET_{i,t}$ refers to the total assets (COMPUSTAT annual item AT) of stock $i$ in year $t$ , following Cooper, Gulen, and Schill (2008).                                                                                                                                                                                                                                                                                                                                                                                                                                                                                                                                                                                                                                                                                                                                                                                                                                                                                                                                    |
| $\Delta$ Shares Outstanding     | The annual percent change in shares outstanding, following Pontiff and Woodgate (2008).                                                                                                                                                                                                                                                                                                                                                                                                                                                                                                                                                                                                                                                                                                                                                                                                                                                                                                                                                                                                                                                                                                                      |
| Corporate Investment            | Corporate investment in a given quarter $t$ is computed as follows: $CI_{i,t} = PPE_{i,t} - (PPE_{i,t-1} + PPE_{i,t-2} + PPE_{i,t-3}) / 3$ , where $PPE_{i,t}$ refers to the ratio of change in net property, plant, and equipment (COMPUSTAT quarterly item PPENTQ) divided by sales (item SALEQ) of stock $i$ in quarter $t$ . If SALEQ is 0 or negative, then replace SALEQ with 0.01, following Titman, Wei, and Xie (2004).                                                                                                                                                                                                                                                                                                                                                                                                                                                                                                                                                                                                                                                                                                                                                                             |
| Dividend-to-Price               | Total dividends (COMPUSTAT annual item DVT) divided by market capitalization at fiscal year-end, following Litzenger and Ramaswamy (1982).                                                                                                                                                                                                                                                                                                                                                                                                                                                                                                                                                                                                                                                                                                                                                                                                                                                                                                                                                                                                                                                                   |
| Gross Profitability             | Gross profitability in a given year $t$ is computed as follows: $GP_{i,t} = (REVT_{i,t} - COGS_{i,t}) / ASSET_{i,t}$ , where $REVT_{i,t}$ refers to the total revenue (COMPUSTAT annual item REVT) of stock $i$ in year $t$ , $COGS_{i,t}$ refers to the cost of goods sold (item COGS), and $ASSET_{i,t}$ is the total assets (item AT), following Novy-Marx (2013).                                                                                                                                                                                                                                                                                                                                                                                                                                                                                                                                                                                                                                                                                                                                                                                                                                        |
| Leverage                        | Total liabilities (COMPUSTAT annual item LT) divided by market capitalization at fiscal year-end, following Bhandari (1988).                                                                                                                                                                                                                                                                                                                                                                                                                                                                                                                                                                                                                                                                                                                                                                                                                                                                                                                                                                                                                                                                                 |
| ROA                             | Return on assets in a given quarter $t$ , computed as follows: $ROA_{i,t} = INCOME_{i,t} / ASSET_{i,t-1}$ , where $INCOME_{i,t}$ refers to the income before extraordinary items (COMPUSTAT quarterly item IBQ) of stock $i$ in quarter $t$ , and $ASSET_{i,t-1}$ refers to the total assets (item ATQ), following Balakrishnan, Bartov, and Faurel (2010).                                                                                                                                                                                                                                                                                                                                                                                                                                                                                                                                                                                                                                                                                                                                                                                                                                                  |
| ROE                             | Return on equity in a given quarter $t$ is computed as follows: $ROE_{i,t} = INCOME_{i,t} / EQUITY_{i,t-1}$ , where $INCOME_{i,t}$ refers to the income before extraordinary items (COMPUSTAT quarterly item                                                                                                                                                                                                                                                                                                                                                                                                                                                                                                                                                                                                                                                                                                                                                                                                                                                                                                                                                                                                 |

---

|                                 |                                                                                                                                                                                                                                                                                                                                                                                                                                                                                                                                                                                                                                                                      |
|---------------------------------|----------------------------------------------------------------------------------------------------------------------------------------------------------------------------------------------------------------------------------------------------------------------------------------------------------------------------------------------------------------------------------------------------------------------------------------------------------------------------------------------------------------------------------------------------------------------------------------------------------------------------------------------------------------------|
|                                 | IBQ) of stock $i$ in quarter $t$ , and $EQUITY_{i,t-1}$ refers to the shareholders' equity. Depending on availability, we use stockholders' equity (item SEQQ), or common equity (item CEQQ) plus redemption value (item PSTKRQ), or common equity (item CEQQ) plus the carrying value of preferred stock (item PSTKQ), or total assets (item ATQ) minus total liabilities (item LTQ), in that order, as shareholders' equity, following Hou, Xue, and Zhang (2015).                                                                                                                                                                                                 |
| %Rated                          | The number of firms with S&P long-term issuer credit rating divided by the total number of firms.                                                                                                                                                                                                                                                                                                                                                                                                                                                                                                                                                                    |
| Credit Rating                   | The monthly S&P long-term issuer credit rating is as reported in COMPUSTAT. We transform the S&P ratings into ascending numerical scores, where AAA = 1, AA+ = 2, AA = 3, AA- = 4, A+ = 5, A = 6, A- = 7, BBB+ = 8, BBB = 9, BBB- = 10, BB+ = 11, BB = 12, BB- = 13, B+ = 14, B = 15, B- = 16, CCC+ = 17, CCC = 18, CCC- = 19, CC = 20, C = 21, and D = 22, following Avramov, Chordia, Jostova, and Philipov (2009).                                                                                                                                                                                                                                                |
| Analyst Coverage                | The number of analysts following the firm as reported in I/B/E/S in each quarter.                                                                                                                                                                                                                                                                                                                                                                                                                                                                                                                                                                                    |
| Analyst Dispersion              | The standard deviation of analysts' earnings (earnings per share, EPS) forecasts divided by the absolute value of the median earnings forecast as reported in I/B/E/S in each quarter.                                                                                                                                                                                                                                                                                                                                                                                                                                                                               |
| SUE                             | The standardized unexpected earnings (SUE) in a given quarter $t$ is computed as follows:<br>$SUE_{i,t} = (EPS_{i,t} - F_{i,t})/P_{i,t}$ , where $EPS_{i,t}$ refers to the actual earnings per share for stock $i$ in quarter $t$ , $F_{i,t}$ refers to the median earnings forecast for the current fiscal quarter, and $P_{i,t}$ refers to the stock price. If $EPS_{i,t}$ or $F_{i,t}$ is missing then $SUE_{i,t} = \frac{INCOME_{i,t} - INCOME_{i,t-4}}{MV_{i,t}}$ , where $INCOME_{i,t}$ refers to the income before extraordinary items (COMPUSTAT quarterly item IBQ) of stock $i$ in quarter $t$ , and $MV_{i,t}$ refers to the stock market capitalization. |
| <b>B. Market State Measures</b> |                                                                                                                                                                                                                                                                                                                                                                                                                                                                                                                                                                                                                                                                      |
| SENT                            | The monthly Baker and Wurgler (2007) investor sentiment. We use the raw version of the Baker-Wurgler sentiment index that excludes the NYSE turnover variable.                                                                                                                                                                                                                                                                                                                                                                                                                                                                                                       |
| MKTVOL                          | The standard deviation of daily CRSP value-weighted index returns in a month.                                                                                                                                                                                                                                                                                                                                                                                                                                                                                                                                                                                        |
| VIX                             | The average daily VIX index of implied volatilities of S&P 500 index options in a month.                                                                                                                                                                                                                                                                                                                                                                                                                                                                                                                                                                             |
| MKTILLIQ                        | The value-weighted average of stock-level Amihud (2002) illiquidity for all NYSE/AMEX stocks in a month, following Avramov, Cheng, and Hameed (2016). The stock-level Amihud illiquidity is defined as in <i>Log(Illiquidity)</i> .                                                                                                                                                                                                                                                                                                                                                                                                                                  |
| DOWN                            | A dummy variable that takes a value of 1 if CRSP value-weighted index return is negative in a month and 0 otherwise.                                                                                                                                                                                                                                                                                                                                                                                                                                                                                                                                                 |
| TERM                            | The difference between the average yield of 10-year Treasury bonds and three-month T-bills, following Welch and Goyal (2008).                                                                                                                                                                                                                                                                                                                                                                                                                                                                                                                                        |
| DEF                             | The difference between the average yield of bonds rated BAA and AAA by Moody's, following Welch and Goyal (2008).                                                                                                                                                                                                                                                                                                                                                                                                                                                                                                                                                    |

---

**Table IA1: Number of Stocks Over Time**

This table reports the average number of stocks per month on a year-by-year basis for the full sample as well as for subsamples for which we exclude the microcaps, require firms to have an S&P long-term issuer credit rating, and exclude observations from 12 months before to 12 months after an issuer credit rating downgrade.

| Average Number of Stocks Over Time |             |              |                      |               |             |              |                      |               |
|------------------------------------|-------------|--------------|----------------------|---------------|-------------|--------------|----------------------|---------------|
| Year                               | GKX Sample  |              |                      |               | CPZ Sample  |              |                      |               |
|                                    | Full Sample | Nonmicrocaps | Credit Rating Sample | Nondowngrades | Full Sample | Nonmicrocaps | Credit Rating Sample | Nondowngrades |
| 1987                               | 5,320       | 1,928        | 1,042                | 764           | 2,080       | 939          | 554                  | 406           |
| 1988                               | 5,711       | 2,055        | 1,030                | 787           | 2,113       | 977          | 534                  | 420           |
| 1989                               | 5,799       | 2,110        | 985                  | 731           | 2,191       | 994          | 509                  | 400           |
| 1990                               | 5,783       | 2,174        | 926                  | 638           | 2,164       | 974          | 461                  | 349           |
| 1991                               | 5,827       | 2,337        | 901                  | 633           | 2,266       | 1,056        | 450                  | 337           |
| 1992                               | 5,869       | 2,469        | 930                  | 722           | 2,433       | 1,135        | 478                  | 378           |
| 1993                               | 6,209       | 2,696        | 1,005                | 809           | 2,504       | 1,171        | 501                  | 405           |
| 1994                               | 6,784       | 2,955        | 1,095                | 895           | 2,541       | 1,202        | 521                  | 425           |
| 1995                               | 7,270       | 3,327        | 1,165                | 955           | 2,551       | 1,295        | 542                  | 439           |
| 1996                               | 7,519       | 3,555        | 1,282                | 1,072         | 2,553       | 1,326        | 578                  | 478           |
| 1997                               | 7,830       | 3,667        | 1,405                | 1,150         | 2,635       | 1,372        | 640                  | 512           |
| 1998                               | 7,877       | 3,709        | 1,541                | 1,190         | 2,667       | 1,401        | 701                  | 533           |
| 1999                               | 7,523       | 3,733        | 1,638                | 1,188         | 2,689       | 1,449        | 735                  | 519           |
| 2000                               | 7,308       | 3,881        | 1,623                | 1,133         | 2,602       | 1,476        | 739                  | 504           |
| 2001                               | 7,068       | 3,576        | 1,601                | 1,048         | 2,563       | 1,430        | 739                  | 491           |
| 2002                               | 6,761       | 3,424        | 1,578                | 1,029         | 2,620       | 1,472        | 768                  | 519           |
| 2003                               | 6,402       | 3,387        | 1,550                | 1,108         | 2,649       | 1,541        | 795                  | 567           |
| 2004                               | 6,208       | 3,465        | 1,575                | 1,243         | 2,675       | 1,653        | 841                  | 647           |
| 2005                               | 6,154       | 3,447        | 1,559                | 1,238         | 2,755       | 1,679        | 850                  | 648           |
| 2006                               | 6,160       | 3,470        | 1,535                | 1,189         | 2,706       | 1,669        | 847                  | 631           |
| 2007                               | 6,148       | 3,424        | 1,483                | 1,109         | 2,533       | 1,607        | 822                  | 612           |
| 2008                               | 6,228       | 3,371        | 1,415                | 914           | 2,368       | 1,519        | 779                  | 514           |
| 2009                               | 5,910       | 3,272        | 1,360                | 904           | 2,296       | 1,497        | 753                  | 512           |
| 2010                               | 5,404       | 3,059        | 1,351                | 1,090         | 2,263       | 1,494        | 757                  | 619           |
| 2011                               | 5,279       | 3,036        | 1,354                | 1,129         | 2,234       | 1,508        | 773                  | 657           |
| 2012                               | 5,227       | 3,057        | 1,362                | 1,128         | 2,212       | 1,505        | 781                  | 651           |
| 2013                               | 5,117       | 3,054        | 1,376                | 1,176         | 2,169       | 1,490        | 788                  | 666           |
| 2014                               | 5,143       | 3,146        | 1,414                | 1,182         | 2,081       | 1,460        | 786                  | 642           |
| 2015                               | 5,270       | 3,270        | 1,464                | 1,109         | 2,024       | 1,413        | 788                  | 564           |
| 2016                               | 5,292       | 3,236        | 1,427                | 1,109         | 1,933       | 1,344        | 763                  | 563           |
| 2017                               | 5,255       | 3,213        | 1,385                | 1,274         |             |              |                      |               |
| Total                              | 21,882      | 13,119       | 4,715                | 4,499         | 7,904       | 5,083        | 2,436                | 2,294         |

**Table IA2: Performance of Portfolios Sorted by Neural Network Predicted Returns: Equal-Weighted Returns**

At the end of each month  $t$ , stocks are sorted into deciles according to their one-month-ahead out-of-sample predicted returns ( $\hat{R}$ ) using a neural network with three hidden layers (NN3) (Gu, Kelly, and Xiu 2020). This table reports the equal-weighted returns for month  $t + 1$  for each decile portfolio as well as the strategy of going long (short) on the highest (lowest) expected return stocks (“HML”) over the entire sample period from 1987 to 2017. Portfolio returns are further adjusted by the CAPM, Fama-French-Carhart 4-factor and Pástor-Stambaugh liquidity factor model (FFC+PS), Fama-French 5-factor model (FF5), Fama-French 6-factor model (FF6), and Stambaugh-Yuan 4-factor model (SY). Panel A reports the results for the full sample as well as the subsample that excludes microcaps. Panel B reports similar statistics for the subsamples that exclude nonrated firms and credit rating downgrades. Newey-West adjusted t-statistics are shown in parentheses. Numbers with “\*”, “\*\*”, and “\*\*\*” are significant at the 10%, 5%, and 1% levels, respectively.

| Panel A: Equal-Weighted Returns to Investment Strategies Sorted by NN3-Predicted Returns (Full Sample and Microcaps Excluded) |                    |                      |                      |                      |                      |                    |                    |                      |                      |                     |                   |                    |
|-------------------------------------------------------------------------------------------------------------------------------|--------------------|----------------------|----------------------|----------------------|----------------------|--------------------|--------------------|----------------------|----------------------|---------------------|-------------------|--------------------|
| Rank of $\hat{R}$                                                                                                             | Full Sample        |                      |                      |                      |                      |                    | Nonmicrocaps       |                      |                      |                     |                   |                    |
|                                                                                                                               | Return             | CAPM                 | FFC+PS               | FF5                  | FF6                  | SY                 | Return             | CAPM                 | FFC+PS               | FF5                 | FF6               | SY                 |
| Low                                                                                                                           | -0.121<br>(-0.26)  | -1.383***<br>(-5.55) | -0.879***<br>(-5.23) | -0.763***<br>(-3.61) | -0.466***<br>(-3.09) | -0.381*<br>(-1.73) | 0.274<br>(0.60)    | -1.067***<br>(-4.38) | -0.545***<br>(-3.32) | -0.391**<br>(-2.05) | -0.112<br>(-0.90) | -0.024<br>(-0.12)  |
| 2                                                                                                                             | 0.569<br>(1.59)    | -0.498***<br>(-2.98) | -0.189*<br>(-1.70)   | -0.203<br>(-1.35)    | 0.011<br>(0.11)      | 0.135<br>(0.88)    | 0.666**<br>(1.98)  | -0.447***<br>(-3.31) | -0.182**<br>(-2.06)  | -0.172<br>(-1.32)   | 0.002<br>(0.03)   | 0.088<br>(0.72)    |
| 3                                                                                                                             | 0.713**<br>(2.32)  | -0.235<br>(-1.62)    | -0.086<br>(-0.88)    | -0.146<br>(-1.21)    | -0.005<br>(-0.05)    | 0.098<br>(0.80)    | 0.791***<br>(2.72) | -0.201*<br>(-1.73)   | -0.094<br>(-1.21)    | -0.149<br>(-1.59)   | -0.042<br>(-0.55) | 0.074<br>(0.79)    |
| 4                                                                                                                             | 0.931***<br>(3.29) | 0.042<br>(0.30)      | 0.103<br>(1.09)      | -0.009<br>(-0.08)    | 0.088<br>(0.90)      | 0.195<br>(1.63)    | 0.862***<br>(3.38) | -0.069<br>(-0.66)    | -0.053<br>(-0.87)    | -0.140*<br>(-1.88)  | -0.083<br>(-1.31) | 0.010<br>(0.12)    |
| 5                                                                                                                             | 0.962***<br>(3.61) | 0.113<br>(0.77)      | 0.106<br>(1.04)      | 0.012<br>(0.11)      | 0.063<br>(0.59)      | 0.144<br>(1.15)    | 1.005***<br>(4.03) | 0.106<br>(0.92)      | 0.058<br>(0.74)      | -0.077<br>(-1.03)   | -0.049<br>(-0.70) | 0.042<br>(0.50)    |
| 6                                                                                                                             | 1.115***<br>(4.23) | 0.260*<br>(1.73)     | 0.228**<br>(2.15)    | 0.121<br>(1.13)      | 0.155<br>(1.41)      | 0.238*<br>(1.88)   | 1.073***<br>(4.43) | 0.186<br>(1.46)      | 0.105<br>(1.19)      | -0.002<br>(-0.03)   | 0.004<br>(0.04)   | 0.082<br>(0.82)    |
| 7                                                                                                                             | 1.205***<br>(4.36) | 0.338**<br>(2.04)    | 0.280**<br>(2.37)    | 0.184<br>(1.56)      | 0.203*<br>(1.69)     | 0.290**<br>(2.14)  | 1.163***<br>(4.60) | 0.256*<br>(1.96)     | 0.140*<br>(1.67)     | 0.041<br>(0.60)     | 0.026<br>(0.36)   | 0.075<br>(0.88)    |
| 8                                                                                                                             | 1.344***<br>(4.49) | 0.460**<br>(2.47)    | 0.403***<br>(3.27)   | 0.302***<br>(2.63)   | 0.324***<br>(2.69)   | 0.427***<br>(3.03) | 1.201***<br>(4.73) | 0.289**<br>(2.15)    | 0.161**<br>(2.00)    | 0.036<br>(0.53)     | 0.016<br>(0.23)   | 0.111<br>(1.25)    |
| 9                                                                                                                             | 1.563***<br>(4.95) | 0.664***<br>(3.15)   | 0.614***<br>(4.68)   | 0.547***<br>(4.14)   | 0.570***<br>(4.12)   | 0.685***<br>(4.53) | 1.333***<br>(5.09) | 0.419***<br>(2.86)   | 0.272***<br>(3.31)   | 0.170**<br>(2.41)   | 0.133*<br>(1.89)  | 0.225**<br>(2.36)  |
| High                                                                                                                          | 2.349***<br>(5.35) | 1.360***<br>(4.17)   | 1.618***<br>(5.52)   | 1.586***<br>(4.96)   | 1.770***<br>(5.22)   | 1.931***<br>(5.12) | 1.517***<br>(5.21) | 0.559***<br>(3.13)   | 0.396***<br>(3.95)   | 0.290***<br>(3.02)  | 0.241**<br>(2.50) | 0.333***<br>(2.87) |
| HML                                                                                                                           | 2.470***<br>(9.03) | 2.742***<br>(9.78)   | 2.497***<br>(9.27)   | 2.349***<br>(9.35)   | 2.236***<br>(8.06)   | 2.312***<br>(7.91) | 1.243***<br>(3.75) | 1.625***<br>(5.04)   | 0.940***<br>(4.19)   | 0.680***<br>(2.89)  | 0.353**<br>(2.02) | 0.357<br>(1.37)    |

Table IA2—Continued

| Panel B: Equal-Weighted Returns to Investment Strategies Sorted by NN3-Predicted Returns (Credit Rating Sample and Downgrades Excluded) |                      |                      |                      |                      |                      |                   |                    |                    |                    |                    |                    |                    |
|-----------------------------------------------------------------------------------------------------------------------------------------|----------------------|----------------------|----------------------|----------------------|----------------------|-------------------|--------------------|--------------------|--------------------|--------------------|--------------------|--------------------|
| Rank of $\hat{R}$                                                                                                                       | Credit Rating Sample |                      |                      |                      |                      |                   | Nondowngrades      |                    |                    |                    |                    |                    |
|                                                                                                                                         | Return               | CAPM                 | FFC+PS               | FF5                  | FF6                  | SY                | Return             | CAPM               | FFC+PS             | FF5                | FF6                | SY                 |
| Low                                                                                                                                     | 0.056<br>(0.12)      | -1.289***<br>(-4.94) | -0.741***<br>(-4.47) | -0.904***<br>(-3.02) | -0.488***<br>(-2.99) | -0.213<br>(-0.84) | 1.103***<br>(2.63) | -0.147<br>(-0.65)  | 0.297*<br>(1.85)   | 0.148<br>(0.64)    | 0.468***<br>(2.87) | 0.762***<br>(3.13) |
| 2                                                                                                                                       | 0.785**<br>(2.12)    | -0.329*<br>(-1.84)   | -0.140<br>(-1.23)    | -0.358**<br>(-2.11)  | -0.118<br>(-1.03)    | 0.111<br>(0.55)   | 1.290***<br>(4.01) | 0.225<br>(1.43)    | 0.388***<br>(3.24) | 0.165<br>(1.07)    | 0.357***<br>(3.15) | 0.617***<br>(3.26) |
| 3                                                                                                                                       | 0.863**<br>(2.51)    | -0.158<br>(-0.85)    | -0.108<br>(-0.84)    | -0.357**<br>(-2.50)  | -0.195<br>(-1.56)    | -0.006<br>(-0.03) | 1.216***<br>(4.16) | 0.251<br>(1.54)    | 0.282**<br>(2.40)  | 0.049<br>(0.40)    | 0.175<br>(1.53)    | 0.365**<br>(2.21)  |
| 4                                                                                                                                       | 0.972***<br>(3.11)   | -0.035<br>(-0.21)    | -0.021<br>(-0.20)    | -0.251**<br>(-2.38)  | -0.128<br>(-1.43)    | 0.063<br>(0.41)   | 1.229***<br>(4.51) | 0.271*<br>(1.86)   | 0.248**<br>(2.31)  | 0.066<br>(0.67)    | 0.148<br>(1.50)    | 0.324**<br>(2.24)  |
| 5                                                                                                                                       | 1.188***<br>(4.30)   | 0.256*<br>(1.69)     | 0.192**<br>(2.07)    | -0.023<br>(-0.24)    | 0.058<br>(0.68)      | 0.210<br>(1.52)   | 1.415***<br>(5.65) | 0.517***<br>(3.73) | 0.434***<br>(4.14) | 0.230**<br>(2.45)  | 0.283***<br>(3.06) | 0.433***<br>(3.22) |
| 6                                                                                                                                       | 0.986***<br>(3.61)   | 0.065<br>(0.43)      | -0.045<br>(-0.46)    | -0.192*<br>(-1.88)   | -0.155<br>(-1.55)    | -0.049<br>(-0.39) | 1.302***<br>(5.29) | 0.413***<br>(2.92) | 0.282***<br>(2.74) | 0.121<br>(1.35)    | 0.135<br>(1.44)    | 0.245**<br>(2.06)  |
| 7                                                                                                                                       | 1.124***<br>(4.16)   | 0.211<br>(1.36)      | 0.083<br>(0.78)      | -0.115<br>(-1.21)    | -0.090<br>(-0.93)    | 0.034<br>(0.27)   | 1.377***<br>(5.53) | 0.493***<br>(3.24) | 0.357***<br>(3.07) | 0.161*<br>(1.68)   | 0.169*<br>(1.68)   | 0.301**<br>(2.34)  |
| 8                                                                                                                                       | 1.186***<br>(4.42)   | 0.273*<br>(1.78)     | 0.151<br>(1.37)      | -0.074<br>(-0.73)    | -0.044<br>(-0.45)    | 0.130<br>(0.93)   | 1.452***<br>(5.93) | 0.568***<br>(3.92) | 0.421***<br>(3.93) | 0.216**<br>(2.42)  | 0.215**<br>(2.33)  | 0.367***<br>(2.86) |
| 9                                                                                                                                       | 1.275***<br>(4.77)   | 0.361**<br>(2.33)    | 0.210**<br>(2.32)    | 0.030<br>(0.34)      | 0.030<br>(0.35)      | 0.206*<br>(1.78)  | 1.512***<br>(6.08) | 0.626***<br>(4.15) | 0.454***<br>(5.06) | 0.296***<br>(3.46) | 0.277***<br>(3.31) | 0.439***<br>(3.83) |
| High                                                                                                                                    | 1.431***<br>(4.42)   | 0.470**<br>(2.31)    | 0.342**<br>(2.53)    | 0.143<br>(1.08)      | 0.163<br>(1.27)      | 0.334**<br>(2.26) | 1.770***<br>(6.18) | 0.850***<br>(4.52) | 0.659***<br>(5.49) | 0.471***<br>(4.70) | 0.442***<br>(4.21) | 0.558***<br>(4.16) |
| HML                                                                                                                                     | 1.374***<br>(4.08)   | 1.759***<br>(5.75)   | 1.083***<br>(4.59)   | 1.048***<br>(3.63)   | 0.652***<br>(3.16)   | 0.548*<br>(1.93)  | 0.667**<br>(2.11)  | 0.997***<br>(3.40) | 0.362*<br>(1.70)   | 0.323<br>(1.32)    | -0.026<br>(-0.13)  | -0.205<br>(-0.73)  |

**Table IA3: Performance of Portfolios Sorted by OLS Predicted Returns and Individual Anomalies**

At the end of each month  $t$ , stocks are sorted into deciles according to their one-month-ahead out-of-sample predicted returns using ordinary least squares (OLS). Panel A reports the equal- and value-weighted return for month  $t + 1$  for the strategy of going long (short) on the highest (lowest) expected return stocks (“HML”) over the entire sample period from 1987 to 2017. Portfolio returns are further adjusted by the CAPM, Fama-French-Carhart 4-factor and Pástor-Stambaugh liquidity factor model (FFC+PS), Fama-French 5-factor model (FF5), Fama-French 6-factor model (FF6), and Stambaugh-Yuan 4-factor model (SY). We report results for the full sample as well as subsamples that exclude microcaps, nonrated firms, and credit rating downgrades. Panel B reports similar statistics, while at the end of each month  $t$ , stocks are sorted into deciles according to each of the 94 firm characteristics. We adjust the sign of those characteristics so that a higher value predicts higher future performance according to the original studies. For each characteristic, we compute the equal- and value-weighted return for month  $t + 1$  for the strategy of going long (short) on the highest (lowest) expected return stocks (“HML”). Then, we compute an equal-weighted average of portfolio returns across 94 characteristics. Newey-West adjusted t-statistics are shown in parentheses. Numbers with “\*”, “\*\*”, and “\*\*\*” are significant at the 10%, 5%, and 1% levels, respectively.

| Panel A: Returns to Investment Strategies Sorted by OLS-Predicted Returns |                    |                    |                    |                    |                    |                    |                    |                    |                    |                    |                    |                    |
|---------------------------------------------------------------------------|--------------------|--------------------|--------------------|--------------------|--------------------|--------------------|--------------------|--------------------|--------------------|--------------------|--------------------|--------------------|
|                                                                           | Equal-Weighted     |                    |                    |                    |                    |                    | Value-Weighted     |                    |                    |                    |                    |                    |
|                                                                           | Return             | CAPM               | FFC+PS             | FF5                | FF6                | SY                 | Return             | CAPM               | FFC+PS             | FF5                | FF6                | SY                 |
| Full Sample                                                               | 1.215***<br>(5.25) | 1.162***<br>(4.78) | 1.272***<br>(5.28) | 1.521***<br>(5.95) | 1.545***<br>(5.85) | 1.475***<br>(4.69) | 0.084<br>(0.39)    | 0.118<br>(0.50)    | 0.164<br>(0.64)    | 0.308<br>(1.09)    | 0.268<br>(0.92)    | 0.127<br>(0.37)    |
| Nonmicrocaps                                                              | 0.472**<br>(2.37)  | 0.410*<br>(1.84)   | 0.367*<br>(1.66)   | 0.565**<br>(2.42)  | 0.514**<br>(2.19)  | 0.409<br>(1.47)    | 0.013<br>(0.07)    | 0.060<br>(0.30)    | 0.128<br>(0.61)    | 0.237<br>(1.04)    | 0.223<br>(0.95)    | 0.074<br>(0.25)    |
| Credit Rating Sample                                                      | 0.437*<br>(1.78)   | 0.361<br>(1.50)    | 0.488**<br>(2.02)  | 0.458**<br>(2.00)  | 0.563**<br>(2.33)  | 0.632**<br>(2.02)  | 0.024<br>(0.12)    | 0.061<br>(0.27)    | 0.135<br>(0.61)    | 0.103<br>(0.46)    | 0.115<br>(0.49)    | 0.133<br>(0.51)    |
| Nondowngrades                                                             | 0.506**<br>(2.39)  | 0.480**<br>(2.13)  | 0.506**<br>(2.29)  | 0.412*<br>(1.96)   | 0.470**<br>(2.08)  | 0.550**<br>(1.97)  | -0.008<br>(-0.04)  | 0.035<br>(0.15)    | 0.078<br>(0.34)    | 0.082<br>(0.34)    | 0.065<br>(0.26)    | 0.032<br>(0.12)    |
| Panel B: Returns to Investment Strategies Sorted by Individual Anomalies  |                    |                    |                    |                    |                    |                    |                    |                    |                    |                    |                    |                    |
|                                                                           | Equal-Weighted     |                    |                    |                    |                    |                    | Value-Weighted     |                    |                    |                    |                    |                    |
|                                                                           | Return             | CAPM               | FFC+PS             | FF5                | FF6                | SY                 | Return             | CAPM               | FFC+PS             | FF5                | FF6                | SY                 |
| Full Sample                                                               | 0.366***<br>(5.92) | 0.472***<br>(8.18) | 0.346***<br>(7.91) | 0.308***<br>(6.03) | 0.250***<br>(6.07) | 0.221***<br>(3.95) | 0.192***<br>(2.91) | 0.306***<br>(5.41) | 0.189***<br>(4.88) | 0.139***<br>(3.27) | 0.092***<br>(2.89) | 0.043<br>(1.19)    |
| Nonmicrocaps                                                              | 0.233***<br>(3.71) | 0.344***<br>(6.11) | 0.218***<br>(6.21) | 0.167***<br>(4.40) | 0.115***<br>(4.60) | 0.079**<br>(2.16)  | 0.170***<br>(2.74) | 0.272***<br>(4.87) | 0.151***<br>(4.02) | 0.095**<br>(2.57)  | 0.049*<br>(1.87)   | -0.003<br>(-0.09)  |
| Credit Rating Sample                                                      | 0.302***<br>(5.11) | 0.387***<br>(6.78) | 0.263***<br>(6.24) | 0.244***<br>(4.59) | 0.182***<br>(4.56) | 0.121**<br>(2.55)  | 0.131**<br>(2.47)  | 0.215***<br>(4.75) | 0.111***<br>(3.11) | 0.092**<br>(2.20)  | 0.045<br>(1.42)    | -0.017<br>(-0.52)  |
| Nondowngrades                                                             | 0.124***<br>(2.60) | 0.197***<br>(4.45) | 0.103***<br>(3.31) | 0.083**<br>(2.11)  | 0.039<br>(1.22)    | -0.017<br>(-0.44)  | 0.071<br>(1.48)    | 0.142***<br>(3.28) | 0.046<br>(1.44)    | 0.038<br>(0.93)    | -0.004<br>(-0.13)  | -0.071*<br>(-1.93) |

**Table IA4: Neural Network Estimation Based on Subsamples: Equal-Weighted Returns**

At the end of each month  $t$ , stocks are sorted into deciles according to their NN3-predicted returns ( $\hat{R}$ ) (Gu, Kelly, and Xiu 2020). This table reports the equal-weighted return for month  $t + 1$  for the strategy of going long (short) on the highest (lowest) expected return stocks. Portfolio returns are further adjusted by the CAPM, Fama-French-Carhart 4-factor and Pástor-Stambaugh liquidity factor model (FFC+PS), Fama-French 5-factor model (FF5), Fama-French 6-factor model (FF6), and Stambaugh-Yuan 4-factor model (SY). We employ the full sample as well as subsamples that exclude microcaps, nonrated firms, and credit rating downgrades for the NN3 estimations (in the “Training” column) and the portfolio sorts (in the “Testing” column). Newey-West adjusted t-statistics are shown in parentheses. Numbers with “\*”, “\*\*”, and “\*\*\*” are significant at the 10%, 5%, and 1% levels, respectively.

| Equal-Weighted Returns to Investment Strategies Sorted by NN3-Predicted Returns |                      |               |                    |                    |                    |                    |                    |                    |
|---------------------------------------------------------------------------------|----------------------|---------------|--------------------|--------------------|--------------------|--------------------|--------------------|--------------------|
| Training                                                                        | Testing              | Sample Period | Return             | CAPM               | FFC+PS             | FF5                | FF6                | SY                 |
| Nonmicrocaps                                                                    | Nonmicrocaps         | 1987–2017     | 1.505***<br>(4.79) | 1.891***<br>(6.31) | 1.147***<br>(5.89) | 1.015***<br>(4.23) | 0.655***<br>(4.25) | 0.571**<br>(2.49)  |
| Credit Rating Sample                                                            | Credit Rating Sample | 1999–2017     | 1.552**<br>(2.48)  | 2.024***<br>(4.01) | 1.482***<br>(4.40) | 1.087**<br>(2.32)  | 0.834***<br>(2.96) | 0.442<br>(1.05)    |
| Nondowngrades                                                                   | Nondowngrades        | 1999–2017     | 0.935***<br>(2.81) | 0.904**<br>(2.44)  | 0.460<br>(1.59)    | 0.203<br>(0.69)    | 0.113<br>(0.42)    | 0.079<br>(0.23)    |
| Full Sample                                                                     | Full Sample          | 1987–2017     | 2.470***<br>(9.03) | 2.742***<br>(9.78) | 2.497***<br>(9.27) | 2.349***<br>(9.35) | 2.236***<br>(8.06) | 2.312***<br>(7.91) |
| Full Sample                                                                     | Nonmicrocaps         | 1987–2017     | 1.243***<br>(3.75) | 1.625***<br>(5.04) | 0.940***<br>(4.19) | 0.680***<br>(2.89) | 0.353**<br>(2.02)  | 0.357<br>(1.37)    |
| Full Sample                                                                     | Full Sample          | 1999–2017     | 2.417***<br>(6.05) | 2.692***<br>(7.03) | 2.483***<br>(7.32) | 2.297***<br>(6.64) | 2.249***<br>(6.15) | 2.300***<br>(5.67) |
| Full Sample                                                                     | Nonmicrocaps         | 1999–2017     | 1.174**<br>(2.28)  | 1.618***<br>(3.64) | 1.111***<br>(4.30) | 0.638**<br>(2.18)  | 0.465**<br>(2.30)  | 0.379<br>(1.14)    |
| Full Sample                                                                     | Credit Rating Sample | 1999–2017     | 1.258**<br>(2.49)  | 1.689***<br>(3.99) | 1.136***<br>(4.08) | 0.878**<br>(2.29)  | 0.663***<br>(2.66) | 0.376<br>(1.01)    |
| Full Sample                                                                     | Nondowngrades        | 1999–2017     | 0.354<br>(0.73)    | 0.733*<br>(1.73)   | 0.194<br>(0.74)    | -0.027<br>(-0.08)  | -0.215<br>(-0.86)  | -0.579<br>(-1.50)  |

**Table IA5: NN3-Predicted Alpha and Value-Weighted Loss Function**

At the end of each month  $t$ , stocks are sorted into deciles according to their NN3-predicted alphas ( $\hat{\alpha}$ ). We employ NN3 to predict FF6-adjusted returns ( $\hat{\alpha}$ ) and adopt a value-weighted loss function in the NN3 estimation. Panel A reports the month  $t + 1$  value-weighted return for each decile portfolio as well as the strategy of going long (short) on the highest (lowest) expected alpha stocks (“HML”) over the entire sample period from 1987 to 2017. Portfolio returns are further adjusted by the Fama-French 6-factor model (FF6). We report the results for the full sample as well as the subsamples that exclude microcaps, nonrated firms, and credit rating downgrades. Panel B reports similar statistics when decile portfolios are sorted by the NN3-predicted returns ( $\hat{R}$ ) (Gu, Kelly, and Xiu 2020) using the same universe of stocks. Newey-West adjusted t-statistics are shown in parentheses. Numbers with “\*”, “\*\*”, and “\*\*\*” are significant at the 10%, 5%, and 1% levels, respectively.

| Panel A: Value-Weighted Returns to Investment Strategies Sorted by NN3-Predicted Alphas |                    |                     |                    |                    |                      |                    |                    |                   |
|-----------------------------------------------------------------------------------------|--------------------|---------------------|--------------------|--------------------|----------------------|--------------------|--------------------|-------------------|
| Rank of $\hat{\alpha}$                                                                  | Full Sample        |                     | Nonmicrocaps       |                    | Credit Rating Sample |                    | Nondowngrades      |                   |
|                                                                                         | Return             | FF6                 | Return             | FF6                | Return               | FF6                | Return             | FF6               |
| Low                                                                                     | 0.168<br>(0.36)    | -0.403**<br>(-2.05) | 0.538<br>(1.43)    | -0.192<br>(-1.30)  | 0.515<br>(1.28)      | -0.216<br>(-1.10)  | 1.012***<br>(2.83) | 0.152<br>(0.77)   |
| 2                                                                                       | 0.648*<br>(1.90)   | -0.155<br>(-1.11)   | 0.692**<br>(2.21)  | -0.170*<br>(-1.81) | 0.736**<br>(2.20)    | -0.147<br>(-1.14)  | 1.099***<br>(3.66) | 0.240<br>(1.54)   |
| 3                                                                                       | 0.781***<br>(2.63) | -0.113<br>(-0.98)   | 0.941***<br>(3.72) | 0.021<br>(0.25)    | 0.941***<br>(3.25)   | -0.028<br>(-0.25)  | 1.197***<br>(4.60) | 0.261**<br>(2.04) |
| 4                                                                                       | 0.943***<br>(3.84) | -0.059<br>(-0.80)   | 0.950***<br>(4.15) | -0.038<br>(-0.46)  | 0.895***<br>(3.51)   | -0.023<br>(-0.23)  | 1.047***<br>(4.51) | 0.162<br>(1.49)   |
| 5                                                                                       | 0.854***<br>(3.73) | -0.121<br>(-1.57)   | 0.909***<br>(3.80) | -0.084<br>(-1.10)  | 1.008***<br>(4.35)   | -0.064<br>(-0.71)  | 1.149***<br>(5.09) | 0.082<br>(0.82)   |
| 6                                                                                       | 1.079***<br>(4.75) | 0.053<br>(0.64)     | 1.083***<br>(5.14) | 0.072<br>(0.99)    | 1.042***<br>(4.58)   | 0.009<br>(0.11)    | 1.158***<br>(5.21) | 0.112<br>(1.24)   |
| 7                                                                                       | 0.979***<br>(4.08) | -0.053<br>(-0.69)   | 0.888***<br>(3.74) | -0.126<br>(-1.46)  | 1.002***<br>(4.47)   | -0.092<br>(-1.13)  | 1.080***<br>(4.77) | -0.006<br>(-0.06) |
| 8                                                                                       | 0.994***<br>(4.64) | -0.062<br>(-0.77)   | 1.023***<br>(4.59) | -0.093<br>(-1.20)  | 0.909***<br>(3.76)   | -0.163*<br>(-1.78) | 1.035***<br>(4.52) | -0.016<br>(-0.17) |
| 9                                                                                       | 1.076***<br>(4.32) | 0.104<br>(1.16)     | 1.148***<br>(4.83) | 0.161*<br>(1.96)   | 1.079***<br>(4.92)   | -0.048<br>(-0.57)  | 1.163***<br>(5.34) | 0.047<br>(0.55)   |
| High                                                                                    | 1.224***<br>(4.18) | 0.203<br>(1.40)     | 1.238***<br>(4.73) | 0.184<br>(1.64)    | 1.215***<br>(4.74)   | 0.124<br>(1.06)    | 1.366***<br>(5.29) | 0.282**<br>(2.42) |
| HML                                                                                     | 1.056***<br>(2.83) | 0.606**<br>(2.20)   | 0.700***<br>(2.61) | 0.376*<br>(1.86)   | 0.701**<br>(2.20)    | 0.340<br>(1.37)    | 0.354<br>(1.22)    | 0.130<br>(0.53)   |

  

| Panel B: Value-Weighted Returns to Investment Strategies Sorted by NN3-Predicted Returns |                    |                    |                    |                   |                      |                    |                    |                    |
|------------------------------------------------------------------------------------------|--------------------|--------------------|--------------------|-------------------|----------------------|--------------------|--------------------|--------------------|
| Rank of $\hat{R}$                                                                        | Full Sample        |                    | Nonmicrocaps       |                   | Credit Rating Sample |                    | Nondowngrades      |                    |
|                                                                                          | Return             | FF6                | Return             | FF6               | Return               | FF6                | Return             | FF6                |
| Low                                                                                      | 0.398<br>(1.01)    | -0.148<br>(-1.10)  | 0.418<br>(1.03)    | -0.100<br>(-0.71) | 0.446<br>(1.08)      | -0.173<br>(-1.05)  | 0.797**<br>(2.12)  | 0.099<br>(0.49)    |
| 2                                                                                        | 0.695**<br>(2.48)  | -0.095<br>(-1.12)  | 0.701**<br>(2.45)  | -0.038<br>(-0.41) | 0.774***<br>(2.66)   | -0.085<br>(-0.82)  | 0.970***<br>(3.67) | 0.113<br>(1.06)    |
| 3                                                                                        | 0.923***<br>(3.58) | -0.026<br>(-0.31)  | 0.866***<br>(3.34) | -0.057<br>(-0.69) | 0.867***<br>(3.17)   | -0.030<br>(-0.27)  | 1.101***<br>(4.31) | 0.228*<br>(1.67)   |
| 4                                                                                        | 0.965***<br>(4.27) | -0.036<br>(-0.59)  | 0.959***<br>(4.12) | -0.031<br>(-0.37) | 0.897***<br>(3.57)   | -0.147<br>(-1.56)  | 0.998***<br>(4.27) | -0.006<br>(-0.07)  |
| 5                                                                                        | 0.945***<br>(4.22) | -0.086<br>(-1.21)  | 0.931***<br>(4.00) | -0.095<br>(-1.24) | 1.072***<br>(4.77)   | -0.022<br>(-0.30)  | 1.165***<br>(5.31) | 0.075<br>(0.82)    |
| 6                                                                                        | 1.006***<br>(4.65) | -0.085<br>(-0.94)  | 0.952***<br>(4.47) | -0.095<br>(-1.43) | 0.935***<br>(4.24)   | -0.128*<br>(-1.67) | 1.055***<br>(4.97) | -0.014<br>(-0.17)  |
| 7                                                                                        | 1.112***<br>(4.72) | 0.009<br>(0.11)    | 1.063***<br>(4.80) | -0.019<br>(-0.23) | 0.989***<br>(4.58)   | -0.119<br>(-1.44)  | 1.122***<br>(5.43) | 0.042<br>(0.46)    |
| 8                                                                                        | 1.181***<br>(5.02) | 0.023<br>(0.25)    | 1.180***<br>(5.12) | 0.040<br>(0.55)   | 1.247***<br>(5.48)   | 0.087<br>(1.21)    | 1.349***<br>(6.17) | 0.205***<br>(2.77) |
| 9                                                                                        | 1.320***<br>(4.91) | 0.148<br>(1.21)    | 1.122***<br>(4.83) | 0.027<br>(0.33)   | 1.029***<br>(4.44)   | -0.095<br>(-1.03)  | 1.097***<br>(4.85) | -0.038<br>(-0.40)  |
| High                                                                                     | 1.973***<br>(6.62) | 0.846***<br>(5.46) | 1.454***<br>(5.54) | 0.248**<br>(2.04) | 1.502***<br>(5.91)   | 0.333***<br>(2.79) | 1.584***<br>(6.31) | 0.403***<br>(3.20) |
| HML                                                                                      | 1.575***<br>(4.82) | 0.994***<br>(4.70) | 1.036***<br>(3.31) | 0.349*<br>(1.71)  | 1.056***<br>(3.29)   | 0.507**<br>(2.30)  | 0.787***<br>(2.63) | 0.303<br>(1.26)    |

**Table IA6: Performance of Portfolios Sorted by Risk Loadings on the Stochastic Discount Factor: Equal-Weighted Returns**

At the end of each month  $t$ , stocks are sorted into deciles according to their risk loadings ( $\beta$ ) on the stochastic discount factor estimated from a combination of deep neural networks (Chen, Pelger, and Zhu 2020). This table reports the equal-weighted returns for month  $t + 1$  for each decile portfolio as well as the strategy of going long (short) on the highest (lowest) risk loading stocks (“HML”) over the entire sample period from 1987 to 2016. Portfolio returns are further adjusted by the CAPM, Fama-French-Carhart 4-factor and Pástor-Stambaugh liquidity factor model (FFC+PS), Fama-French 5-factor model (FF5), Fama-French 6-factor model (FF6), and Stambaugh-Yuan 4-factor model (SY). Panel A reports the results for the full sample as well as the subsample that excludes microcaps. Panel B reports similar statistics for the subsamples that exclude nonrated firms and credit rating downgrades. Newey-West adjusted t-statistics are shown in parentheses. Numbers with “\*”, “\*\*”, and “\*\*\*” are significant at the 10%, 5%, and 1% levels, respectively.

| Panel A: Equal-Weighted Returns to Investment Strategies Sorted by Risk Loadings (Full Sample and Microcaps Excluded) |                     |                      |                      |                      |                      |                     |                    |                      |                      |                      |                      |                    |
|-----------------------------------------------------------------------------------------------------------------------|---------------------|----------------------|----------------------|----------------------|----------------------|---------------------|--------------------|----------------------|----------------------|----------------------|----------------------|--------------------|
| Rank of $\beta$                                                                                                       | Full Sample         |                      |                      |                      |                      |                     | Nonmicrocaps       |                      |                      |                      |                      |                    |
|                                                                                                                       | Return              | CAPM                 | FFC+PS               | FF5                  | FF6                  | SY                  | Return             | CAPM                 | FFC+PS               | FF5                  | FF6                  | SY                 |
| Low                                                                                                                   | -0.110<br>(-0.24)   | -1.141***<br>(-4.10) | -0.889***<br>(-4.18) | -1.087***<br>(-4.93) | -0.826***<br>(-4.10) | -0.644**<br>(-2.31) | 0.315<br>(0.78)    | -0.808***<br>(-3.96) | -0.512***<br>(-3.47) | -0.769***<br>(-4.12) | -0.505***<br>(-3.50) | -0.370*<br>(-1.70) |
| 2                                                                                                                     | 0.607<br>(1.62)     | -0.390**<br>(-2.09)  | -0.267**<br>(-2.02)  | -0.412***<br>(-3.01) | -0.263**<br>(-1.98)  | -0.175<br>(-1.01)   | 0.634**<br>(1.98)  | -0.387***<br>(-2.72) | -0.255***<br>(-2.62) | -0.403***<br>(-3.36) | -0.265**<br>(-2.52)  | -0.162<br>(-1.19)  |
| 3                                                                                                                     | 0.876**<br>(2.56)   | -0.092<br>(-0.58)    | -0.032<br>(-0.29)    | -0.133<br>(-1.24)    | -0.035<br>(-0.32)    | 0.050<br>(0.37)     | 1.018***<br>(3.26) | 0.009<br>(0.07)      | 0.066<br>(0.72)      | -0.057<br>(-0.60)    | 0.031<br>(0.34)      | 0.103<br>(0.98)    |
| 4                                                                                                                     | 1.007***<br>(3.13)  | 0.053<br>(0.35)      | 0.071<br>(0.71)      | -0.056<br>(-0.56)    | 0.015<br>(0.15)      | 0.120<br>(0.94)     | 0.945***<br>(3.22) | -0.021<br>(-0.17)    | -0.012<br>(-0.13)    | -0.157*<br>(-1.71)   | -0.098<br>(-1.13)    | 0.006<br>(0.06)    |
| 5                                                                                                                     | 1.219***<br>(4.05)  | 0.281*<br>(1.86)     | 0.263***<br>(3.06)   | 0.167*<br>(1.70)     | 0.220**<br>(2.30)    | 0.308***<br>(2.79)  | 1.094***<br>(3.86) | 0.131<br>(1.02)      | 0.074<br>(0.98)      | -0.017<br>(-0.22)    | 0.001<br>(0.01)      | 0.055<br>(0.64)    |
| 6                                                                                                                     | 1.249***<br>(4.15)  | 0.310**<br>(2.04)    | 0.242***<br>(2.82)   | 0.157*<br>(1.68)     | 0.186**<br>(2.05)    | 0.287***<br>(2.80)  | 1.279***<br>(4.46) | 0.318**<br>(2.39)    | 0.246***<br>(2.96)   | 0.140*<br>(1.77)     | 0.156**<br>(2.04)    | 0.237***<br>(2.78) |
| 7                                                                                                                     | 1.436***<br>(4.71)  | 0.492***<br>(3.00)   | 0.415***<br>(4.47)   | 0.292***<br>(3.00)   | 0.322***<br>(3.45)   | 0.446***<br>(3.97)  | 1.220***<br>(4.35) | 0.256*<br>(1.73)     | 0.183*<br>(1.96)     | 0.039<br>(0.36)      | 0.065<br>(0.62)      | 0.172<br>(1.56)    |
| 8                                                                                                                     | 1.687***<br>(5.61)  | 0.745***<br>(4.22)   | 0.706***<br>(6.31)   | 0.528***<br>(4.49)   | 0.581***<br>(5.03)   | 0.716***<br>(5.83)  | 1.412***<br>(4.81) | 0.444***<br>(2.96)   | 0.346***<br>(3.83)   | 0.184**<br>(2.11)    | 0.192**<br>(2.31)    | 0.329***<br>(3.49) |
| 9                                                                                                                     | 1.998***<br>(5.93)  | 1.056***<br>(4.70)   | 1.073***<br>(6.26)   | 0.907***<br>(4.54)   | 1.017***<br>(5.05)   | 1.170***<br>(5.44)  | 1.567***<br>(5.49) | 0.600***<br>(3.65)   | 0.494***<br>(4.87)   | 0.268***<br>(2.75)   | 0.294***<br>(3.28)   | 0.429***<br>(4.05) |
| High                                                                                                                  | 3.336***<br>(7.01)  | 2.274***<br>(6.42)   | 2.583***<br>(7.99)   | 2.379***<br>(5.95)   | 2.667***<br>(6.83)   | 2.923***<br>(6.86)  | 1.901***<br>(5.53) | 0.837***<br>(3.85)   | 0.820***<br>(5.84)   | 0.537***<br>(3.21)   | 0.656***<br>(4.76)   | 0.848***<br>(5.23) |
| HML                                                                                                                   | 3.446***<br>(11.25) | 3.415***<br>(11.17)  | 3.473***<br>(9.28)   | 3.465***<br>(8.94)   | 3.492***<br>(8.04)   | 3.566***<br>(8.01)  | 1.586***<br>(6.80) | 1.645***<br>(6.98)   | 1.332***<br>(6.09)   | 1.306***<br>(6.42)   | 1.161***<br>(5.13)   | 1.218***<br>(5.06) |

Table IA6—Continued

| Panel B: Equal-Weighted Returns to Investment Strategies Sorted by Risk Loadings (Credit Rating Sample and Downgrades Excluded) |                      |                     |                    |                      |                     |                    |                    |                    |                    |                    |                    |                    |
|---------------------------------------------------------------------------------------------------------------------------------|----------------------|---------------------|--------------------|----------------------|---------------------|--------------------|--------------------|--------------------|--------------------|--------------------|--------------------|--------------------|
| Rank of $\beta$                                                                                                                 | Credit Rating Sample |                     |                    |                      |                     |                    | Nondowngrades      |                    |                    |                    |                    |                    |
|                                                                                                                                 | Return               | CAPM                | FFC+PS             | FF5                  | FF6                 | SY                 | Return             | CAPM               | FFC+PS             | FF5                | FF6                | SY                 |
| Low                                                                                                                             | 0.489<br>(1.02)      | -0.640**<br>(-2.24) | -0.372*<br>(-1.68) | -0.762***<br>(-2.73) | -0.430*<br>(-1.87)  | -0.137<br>(-0.41)  | 1.013**<br>(2.48)  | -0.033<br>(-0.13)  | 0.228<br>(0.98)    | -0.127<br>(-0.52)  | 0.147<br>(0.64)    | 0.401<br>(1.23)    |
| 2                                                                                                                               | 0.720**<br>(2.00)    | -0.315*<br>(-1.73)  | -0.220<br>(-1.56)  | -0.514***<br>(-3.07) | -0.329**<br>(-2.31) | -0.094<br>(-0.45)  | 1.001***<br>(3.11) | 0.027<br>(0.16)    | 0.090<br>(0.65)    | -0.146<br>(-1.00)  | -0.017<br>(-0.12)  | 0.178<br>(0.98)    |
| 3                                                                                                                               | 1.015***<br>(3.20)   | 0.038<br>(0.23)     | 0.087<br>(0.73)    | -0.151<br>(-1.05)    | -0.010<br>(-0.08)   | 0.175<br>(1.04)    | 1.280***<br>(4.47) | 0.339**<br>(2.28)  | 0.378***<br>(2.80) | 0.176<br>(1.29)    | 0.281**<br>(2.17)  | 0.475***<br>(2.89) |
| 4                                                                                                                               | 0.947***<br>(3.16)   | -0.022<br>(-0.14)   | -0.042<br>(-0.39)  | -0.267**<br>(-2.08)  | -0.183<br>(-1.57)   | -0.051<br>(-0.37)  | 1.205***<br>(4.48) | 0.278*<br>(1.83)   | 0.254**<br>(2.08)  | 0.025<br>(0.19)    | 0.084<br>(0.69)    | 0.222<br>(1.57)    |
| 5                                                                                                                               | 1.057***<br>(3.74)   | 0.116<br>(0.85)     | 0.041<br>(0.42)    | -0.129<br>(-1.24)    | -0.072<br>(-0.73)   | 0.057<br>(0.46)    | 1.280***<br>(4.83) | 0.367***<br>(2.82) | 0.266**<br>(2.36)  | 0.150<br>(1.41)    | 0.170<br>(1.54)    | 0.267**<br>(2.08)  |
| 6                                                                                                                               | 1.207***<br>(4.21)   | 0.262*<br>(1.89)    | 0.165<br>(1.45)    | 0.001<br>(0.01)      | 0.033<br>(0.32)     | 0.175<br>(1.34)    | 1.385***<br>(5.20) | 0.465***<br>(3.31) | 0.348***<br>(2.75) | 0.189*<br>(1.74)   | 0.194*<br>(1.74)   | 0.315**<br>(2.35)  |
| 7                                                                                                                               | 1.203***<br>(4.03)   | 0.250<br>(1.54)     | 0.125<br>(1.11)    | -0.025<br>(-0.21)    | 0.003<br>(0.02)     | 0.150<br>(1.11)    | 1.435***<br>(5.17) | 0.505***<br>(3.12) | 0.355***<br>(3.14) | 0.217*<br>(1.84)   | 0.216*<br>(1.86)   | 0.361***<br>(2.83) |
| 8                                                                                                                               | 1.238***<br>(4.22)   | 0.296*<br>(1.70)    | 0.173<br>(1.49)    | -0.021<br>(-0.18)    | 0.006<br>(0.05)     | 0.178<br>(1.44)    | 1.459***<br>(5.32) | 0.542***<br>(3.11) | 0.395***<br>(3.13) | 0.192<br>(1.54)    | 0.191<br>(1.60)    | 0.355***<br>(2.61) |
| 9                                                                                                                               | 1.415***<br>(4.59)   | 0.441**<br>(2.23)   | 0.331***<br>(2.67) | 0.075<br>(0.59)      | 0.133<br>(1.15)     | 0.278**<br>(2.11)  | 1.635***<br>(5.56) | 0.684***<br>(3.45) | 0.553***<br>(4.43) | 0.288**<br>(2.33)  | 0.331***<br>(2.84) | 0.468***<br>(3.55) |
| High                                                                                                                            | 2.007***<br>(4.69)   | 0.881***<br>(2.93)  | 0.968***<br>(4.17) | 0.613**<br>(2.15)    | 0.840***<br>(3.53)  | 1.120***<br>(4.17) | 2.426***<br>(7.04) | 1.412***<br>(5.59) | 1.369***<br>(6.91) | 1.087***<br>(5.44) | 1.189***<br>(6.21) | 1.395***<br>(7.01) |
| HML                                                                                                                             | 1.519***<br>(5.74)   | 1.522***<br>(5.83)  | 1.340***<br>(4.44) | 1.376***<br>(4.89)   | 1.270***<br>(3.93)  | 1.257***<br>(3.77) | 1.413***<br>(4.85) | 1.444***<br>(5.15) | 1.141***<br>(3.88) | 1.214***<br>(4.53) | 1.041***<br>(3.50) | 0.994***<br>(2.88) |

**Table IA7: IPCA Estimation Based on Subsamples and the Unrestricted IPCA Model**

At the end of each month  $t$ , stocks are sorted into deciles according to their one-month-ahead out-of-sample predicted returns ( $\hat{R}$ ) using instrumented principal component analysis (IPCA) (Kelly, Pruitt, and Su 2019). Panel A reports the month  $t + 1$  value-weighted returns for the strategy of going long (short) on the highest (lowest) expected return stocks. Portfolio returns are further adjusted by the Fama-French 6-factor model (FF6). We employ the full sample as well as subsamples that exclude microcaps, nonrated firms, and credit rating downgrades for the IPCA estimations (in the “Estimation” column) and the portfolio sorts (in the “Testing” column). Panel B employs the unrestricted IPCA model (without zero-alpha restriction) and reports the month  $t + 1$  value-weighted returns and FF6-adjusted returns for each decile portfolio as well as the strategy of going long (short) on the highest (lowest) expected return stocks (“HML”). We report the results for the full sample as well as subsamples that exclude microcaps, nonrated firms, and credit rating downgrades over the entire sample period from 1987 to 2017. Panel C reports similar statistics for the post-2001 period. Newey-West adjusted  $t$ -statistics are shown in parentheses. Numbers with “\*”, “\*\*”, and “\*\*\*” are significant at the 10%, 5%, and 1% levels, respectively.

| Panel A: Value-Weighted Returns to Investment Strategies Sorted by IPCA-Predicted Returns |                      |               |                    |                    |
|-------------------------------------------------------------------------------------------|----------------------|---------------|--------------------|--------------------|
| Estimation                                                                                | Testing              | Sample Period | Return             | FF6                |
| Nonmicrocaps                                                                              | Nonmicrocaps         | 1987–2017     | 1.059***<br>(5.87) | 0.757***<br>(5.30) |
| Credit Rating Sample                                                                      | Credit Rating Sample | 1996–2017     | 0.722*<br>(1.87)   | 0.434*<br>(1.79)   |
| Nondowngrades                                                                             | Nondowngrades        | 1996–2017     | 0.586<br>(1.63)    | 0.118<br>(0.44)    |
| Full Sample                                                                               | Full Sample          | 1987–2017     | 0.945***<br>(5.62) | 0.624***<br>(3.31) |
| Full Sample                                                                               | Nonmicrocaps         | 1987–2017     | 0.901***<br>(5.57) | 0.613***<br>(3.71) |
| Full Sample                                                                               | Full Sample          | 1996–2017     | 1.000***<br>(4.61) | 0.684***<br>(3.02) |
| Full Sample                                                                               | Nonmicrocaps         | 1996–2017     | 0.918***<br>(4.52) | 0.637***<br>(3.32) |
| Full Sample                                                                               | Credit Rating Sample | 1996–2017     | 1.012***<br>(4.70) | 0.708***<br>(3.33) |
| Full Sample                                                                               | Nondowngrades        | 1996–2017     | 0.797***<br>(3.54) | 0.506**<br>(2.21)  |

Table IA7—Continued

| Panel B: Value-Weighted Returns to Investment Strategies Sorted by IPCA-Predicted Returns (1987–2017) |             |           |              |           |                      |           |               |          |
|-------------------------------------------------------------------------------------------------------|-------------|-----------|--------------|-----------|----------------------|-----------|---------------|----------|
| Rank of $\hat{R}$                                                                                     | Full Sample |           | Nonmicrocaps |           | Credit Rating Sample |           | Nondowngrades |          |
|                                                                                                       | Return      | FF6       | Return       | FF6       | Return               | FF6       | Return        | FF6      |
| Low                                                                                                   | 0.374       | -0.241*** | 0.320        | -0.267*** | 0.359                | -0.318*** | 0.672**       | -0.039   |
|                                                                                                       | (1.22)      | (-2.97)   | (1.01)       | (-3.06)   | (1.12)               | (-2.91)   | (2.42)        | (-0.30)  |
| 2                                                                                                     | 0.821***    | -0.018    | 0.732***     | -0.080    | 0.747***             | -0.124    | 0.916***      | 0.043    |
|                                                                                                       | (3.14)      | (-0.28)   | (2.72)       | (-1.04)   | (2.65)               | (-1.65)   | (3.51)        | (0.50)   |
| 3                                                                                                     | 0.906***    | 0.025     | 0.882***     | 0.045     | 0.929***             | 0.093     | 1.066***      | 0.267*** |
|                                                                                                       | (3.64)      | (0.36)    | (3.60)       | (0.76)    | (3.57)               | (1.12)    | (4.52)        | (2.66)   |
| 4                                                                                                     | 0.907***    | -0.057    | 0.941***     | 0.004     | 0.980***             | -0.006    | 1.121***      | 0.162*   |
|                                                                                                       | (4.04)      | (-1.06)   | (3.88)       | (0.06)    | (4.07)               | (-0.08)   | (4.90)        | (1.93)   |
| 5                                                                                                     | 0.995***    | -0.048    | 0.947***     | -0.051    | 0.972***             | -0.100    | 1.113***      | 0.030    |
|                                                                                                       | (4.29)      | (-0.64)   | (4.16)       | (-0.89)   | (4.22)               | (-1.34)   | (5.21)        | (0.38)   |
| 6                                                                                                     | 1.129***    | 0.008     | 0.995***     | -0.041    | 0.958***             | -0.123    | 1.045***      | -0.036   |
|                                                                                                       | (4.82)      | (0.12)    | (4.36)       | (-0.55)   | (4.13)               | (-1.65)   | (4.77)        | (-0.38)  |
| 7                                                                                                     | 1.092***    | 0.054     | 1.130***     | 0.015     | 1.044***             | -0.026    | 1.095***      | 0.047    |
|                                                                                                       | (4.56)      | (0.67)    | (4.95)       | (0.25)    | (4.63)               | (-0.34)   | (4.91)        | (0.58)   |
| 8                                                                                                     | 1.202***    | 0.124     | 1.082***     | 0.052     | 1.098***             | 0.007     | 1.256***      | 0.166*   |
|                                                                                                       | (4.93)      | (1.26)    | (4.53)       | (0.64)    | (4.73)               | (0.08)    | (5.46)        | (1.73)   |
| 9                                                                                                     | 1.453***    | 0.279***  | 1.240***     | 0.110     | 1.206***             | 0.055     | 1.284***      | 0.140    |
|                                                                                                       | (5.40)      | (2.73)    | (5.18)       | (1.17)    | (5.07)               | (0.52)    | (5.38)        | (1.25)   |
| High                                                                                                  | 1.480***    | 0.244*    | 1.409***     | 0.219**   | 1.263***             | 0.063     | 1.380***      | 0.157    |
|                                                                                                       | (4.88)      | (1.71)    | (5.01)       | (1.97)    | (4.74)               | (0.53)    | (5.05)        | (1.26)   |
| HML                                                                                                   | 1.106***    | 0.485***  | 1.089***     | 0.486***  | 0.904***             | 0.381**   | 0.708***      | 0.196    |
|                                                                                                       | (4.61)      | (2.88)    | (4.85)       | (3.58)    | (3.89)               | (2.42)    | (3.18)        | (1.19)   |

  

| Panel C: Value-Weighted Returns to Investment Strategies Sorted by IPCA-Predicted Returns (2001–2017) |             |           |              |           |                      |           |               |         |
|-------------------------------------------------------------------------------------------------------|-------------|-----------|--------------|-----------|----------------------|-----------|---------------|---------|
| Rank of $\hat{R}$                                                                                     | Full Sample |           | Nonmicrocaps |           | Credit Rating Sample |           | Nondowngrades |         |
|                                                                                                       | Return      | FF6       | Return       | FF6       | Return               | FF6       | Return        | FF6     |
| Low                                                                                                   | 0.103       | -0.421*** | 0.070        | -0.434*** | 0.050                | -0.528*** | 0.356         | -0.271* |
|                                                                                                       | (0.22)      | (-3.78)   | (0.15)       | (-3.48)   | (0.10)               | (-3.37)   | (0.91)        | (-1.67) |
| 2                                                                                                     | 0.532       | -0.155*   | 0.433        | -0.251*** | 0.429                | -0.305*** | 0.587         | -0.126  |
|                                                                                                       | (1.35)      | (-1.88)   | (1.06)       | (-2.63)   | (1.01)               | (-3.15)   | (1.53)        | (-1.12) |
| 3                                                                                                     | 0.658*      | 0.009     | 0.613*       | 0.017     | 0.534                | -0.063    | 0.706**       | 0.151   |
|                                                                                                       | (1.77)      | (0.08)    | (1.69)       | (0.21)    | (1.35)               | (-0.54)   | (2.01)        | (1.08)  |
| 4                                                                                                     | 0.678**     | -0.043    | 0.659*       | -0.061    | 0.748**              | 0.023     | 0.867***      | 0.183   |
|                                                                                                       | (2.12)      | (-0.67)   | (1.84)       | (-0.57)   | (2.21)               | (0.20)    | (2.83)        | (1.63)  |
| 5                                                                                                     | 0.716**     | 0.008     | 0.764**      | 0.028     | 0.619*               | -0.140    | 0.769**       | -0.009  |
|                                                                                                       | (2.21)      | (0.09)    | (2.35)       | (0.40)    | (1.80)               | (-1.44)   | (2.50)        | (-0.10) |
| 6                                                                                                     | 0.848***    | 0.073     | 0.712**      | -0.017    | 0.721**              | 0.002     | 0.817***      | 0.118   |
|                                                                                                       | (2.73)      | (0.89)    | (2.26)       | (-0.18)   | (2.25)               | (0.02)    | (2.76)        | (0.90)  |
| 7                                                                                                     | 0.779**     | 0.067     | 0.813***     | 0.033     | 0.814***             | 0.069     | 0.842***      | 0.090   |
|                                                                                                       | (2.48)      | (0.66)    | (2.61)       | (0.42)    | (2.65)               | (0.71)    | (2.86)        | (0.89)  |
| 8                                                                                                     | 0.825***    | 0.096     | 0.772**      | 0.097     | 0.759**              | 0.072     | 0.910***      | 0.227** |
|                                                                                                       | (2.69)      | (0.96)    | (2.52)       | (1.04)    | (2.52)               | (0.74)    | (3.16)        | (2.39)  |
| 9                                                                                                     | 1.164***    | 0.364***  | 0.942***     | 0.222**   | 0.906***             | 0.193*    | 0.957***      | 0.240** |
|                                                                                                       | (3.37)      | (3.00)    | (3.15)       | (2.44)    | (3.00)               | (1.68)    | (3.25)        | (2.05)  |
| High                                                                                                  | 1.168***    | 0.278     | 1.070***     | 0.182     | 1.047***             | 0.168     | 1.146***      | 0.238   |
|                                                                                                       | (3.18)      | (1.64)    | (2.97)       | (1.43)    | (3.01)               | (1.17)    | (3.17)        | (1.50)  |
| HML                                                                                                   | 1.065***    | 0.699***  | 1.000***     | 0.616***  | 0.997***             | 0.696***  | 0.790***      | 0.509** |
|                                                                                                       | (3.26)      | (3.34)    | (3.08)       | (3.68)    | (3.03)               | (3.63)    | (2.67)        | (2.52)  |

## Table IA8: Performance of Machine Learning Portfolios in Predictive Regressions

Panel A presents the results of the following monthly time series regressions, as well as their corresponding Newey-West adjusted t-statistics:

$$HML_t = \alpha_0 + \beta_1 High\ SENT_{t-1} + \beta_2 High\ MKTVOL_{t-1} + \beta_3 High\ MKTILLIQ_{t-1} + \beta_4 M_{t-1} + c'_1 F_t + c'_2 F_t \times High\ SENT_{t-1} + c'_3 F_t \times High\ MKTVOL_{t-1} + c'_4 F_t \times High\ MKTILLIQ_{t-1} + e_t,$$

where  $HML_t$  refers to the value-weighted returns on the high minus low decile portfolios sorted by the NN3-predicted returns (Gu, Kelly, and Xiu 2020) across all stocks in month  $t$ ;  $High\ SENT_{t-1}$  refers to a dummy variable that takes a value of 1 if the Baker and Wurgler (2007) investor sentiment is above the median over the entire sample period and 0 otherwise;  $High\ MKTVOL_{t-1}$  refers to a dummy variable that takes a value of 1 if the market volatility is above the median over the entire sample period and 0 otherwise, and  $High\ MKTILLIQ_{t-1}$  refers to a dummy variable that takes a value of 1 if market illiquidity is above the median and 0 otherwise. We obtain the median breakpoint for market illiquidity in the pre- and post-2001 periods separately.  $High\ SENT_{t-1}$  can be replaced with  $High\ PLS\ SENT_{t-1}$ , defined as a dummy variable that takes a value of 1 if the aligned investor sentiment from Huang, Jiang, Tu, and Zhou (2015) is above the median over the entire sample period and 0 otherwise.  $High\ MKTVOL_{t-1}$  can also be replaced with  $High\ VIX_{t-1}$ , defined as a dummy variable that takes a value of 1 if the implied market volatility is above the median over the entire sample period and 0 otherwise.  $M_{t-1}$  refers to a set of other proxies for market conditions, including down market state (DOWN), defined as a dummy variable that takes a value of 1 if the CRSP value-weighted index return is negative and 0 otherwise; term spread (TERM), defined as the difference between the average yield of 10-year Treasury bonds and three-month T-bills, and default spread (DEF), defined as the difference between the average yield of bonds rated BAA and AAA by Moody's. The vector  $F$  stacks the Fama-French six factors, including the market factor (MKT), the size factor (SMB), the book-to-market factor (HML), the profitability factor (RMW), the investment factor (CMA), and the momentum factor (MOM). Panels B to D report similar statistics when decile portfolios are sorted by the risk loadings on the stochastic discount factor (Chen, Pelger, and Zhu 2020), IPCA-predicted returns (Kelly, Pruitt, and Su 2019), and CA2-predicted returns (Gu, Kelly, and Xiu 2021). Internet Appendix A provides detailed definitions for each variable. Numbers with "\*", "\*\*", and "\*\*\*" are significant at the 10%, 5%, and 1% levels, respectively.

| Panel A: Value-Weighted Returns to Investment Strategies Sorted by NN3-Predicted Returns Regressed on Lagged Market States |                      |                      |                      |                      |                      |                      |                     |                     |
|----------------------------------------------------------------------------------------------------------------------------|----------------------|----------------------|----------------------|----------------------|----------------------|----------------------|---------------------|---------------------|
|                                                                                                                            | Model 1              | Model 2              | Model 3              | Model 4              | Model 5              | Model 6              | Model 7             | Model 8             |
| Constant                                                                                                                   | 0.867<br>(1.14)      | 0.941<br>(1.39)      | 1.255<br>(1.43)      | 1.181<br>(1.64)      | 1.500**<br>(2.02)    | 1.103<br>(1.59)      | 1.679*<br>(1.94)    | 1.079<br>(1.44)     |
| High SENT                                                                                                                  | 0.227<br>(0.58)      |                      | -0.006<br>(-0.01)    |                      | -0.184<br>(-0.38)    |                      | -0.263<br>(-0.46)   |                     |
| High PLS SENT                                                                                                              |                      | 0.459<br>(0.95)      |                      | 0.236<br>(0.48)      |                      | 0.463<br>(0.88)      |                     | 0.449<br>(0.80)     |
| High MKTVOL                                                                                                                | 0.959*<br>(1.93)     | 0.922*<br>(1.89)     |                      |                      | 0.661<br>(1.23)      | 0.672<br>(1.21)      |                     |                     |
| High VIX                                                                                                                   |                      |                      | 1.648***<br>(3.29)   | 1.599***<br>(3.28)   |                      |                      | 1.418**<br>(2.56)   | 1.591***<br>(2.87)  |
| High MKTILLIQ                                                                                                              | 0.591<br>(1.37)      | 0.693<br>(1.52)      | 0.694<br>(1.41)      | 0.727<br>(1.46)      | 0.669<br>(1.43)      | 0.839*<br>(1.78)     | 0.391<br>(0.77)     | 0.442<br>(0.87)     |
| DOWN                                                                                                                       | -0.691*<br>(-1.71)   | -0.712*<br>(-1.70)   | -0.803*<br>(-1.74)   | -0.827*<br>(-1.76)   | -0.310<br>(-0.76)    | -0.422<br>(-1.05)    | -0.295<br>(-0.64)   | -0.437<br>(-0.97)   |
| TERM                                                                                                                       | -0.145<br>(-0.80)    | -0.221<br>(-1.06)    | -0.193<br>(-0.95)    | -0.226<br>(-1.02)    | -0.161<br>(-0.97)    | -0.260<br>(-1.29)    | -0.154<br>(-0.80)   | -0.214<br>(-1.00)   |
| DEF                                                                                                                        | -0.248<br>(-0.33)    | -0.282<br>(-0.39)    | -0.735<br>(-0.94)    | -0.687<br>(-0.93)    | -0.804<br>(-1.28)    | -0.475<br>(-0.71)    | -1.232*<br>(-1.80)  | -0.851<br>(-1.20)   |
| MKT                                                                                                                        | -0.196***<br>(-3.35) | -0.193***<br>(-3.31) | -0.218***<br>(-3.01) | -0.216***<br>(-2.99) | 0.292**<br>(2.27)    | 0.245**<br>(2.01)    | 0.171<br>(1.50)     | 0.174<br>(1.30)     |
| MKT × High SENT                                                                                                            |                      |                      |                      |                      | -0.119<br>(-1.00)    |                      | -0.150<br>(-1.15)   |                     |
| MKT × High PLS SENT                                                                                                        |                      |                      |                      |                      |                      | -0.110<br>(-0.87)    |                     | -0.186<br>(-1.26)   |
| MKT × High MKTVOL                                                                                                          |                      |                      |                      |                      | -0.364***<br>(-3.20) | -0.343***<br>(-2.85) |                     |                     |
| MKT × High VIX                                                                                                             |                      |                      |                      |                      |                      |                      | -0.260**<br>(-1.99) | -0.268**<br>(-2.07) |
| MKT × High MKTILLIQ                                                                                                        |                      |                      |                      |                      | -0.241**<br>(-2.34)  | -0.220**<br>(-2.23)  | -0.230**<br>(-1.99) | -0.185<br>(-1.50)   |
| SMB                                                                                                                        | 0.532***<br>(4.56)   | 0.528***<br>(4.57)   | 0.538***<br>(4.21)   | 0.534***<br>(4.20)   | 0.268<br>(1.57)      | 0.346**<br>(1.97)    | 0.158<br>(0.81)     | 0.301<br>(1.57)     |
| SMB × High SENT                                                                                                            |                      |                      |                      |                      | 0.291<br>(1.64)      |                      | 0.316<br>(1.62)     |                     |
| SMB × High PLS SENT                                                                                                        |                      |                      |                      |                      |                      | 0.102<br>(0.52)      |                     | 0.027<br>(0.13)     |
| SMB × High MKTVOL                                                                                                          |                      |                      |                      |                      | -0.091<br>(-0.54)    | -0.130<br>(-0.81)    |                     |                     |
| SMB × High VIX                                                                                                             |                      |                      |                      |                      |                      |                      | 0.060<br>(0.34)     | -0.005<br>(-0.03)   |
| SMB × High MKTILLIQ                                                                                                        |                      |                      |                      |                      | 0.500**<br>(2.48)    | 0.539***<br>(2.63)   | 0.543**<br>(2.43)   | 0.597***<br>(2.60)  |
| HML                                                                                                                        | 0.125<br>(1.02)      | 0.125<br>(1.02)      | 0.139<br>(1.09)      | 0.135<br>(1.07)      | -0.131<br>(-0.51)    | 0.113<br>(0.44)      | -0.209<br>(-0.82)   | 0.087<br>(0.34)     |
| HML × High SENT                                                                                                            |                      |                      |                      |                      | 0.640***<br>(3.21)   |                      | 0.685***<br>(2.99)  |                     |
| HML × High PLS SENT                                                                                                        |                      |                      |                      |                      |                      | 0.220<br>(0.78)      |                     | 0.193<br>(0.68)     |
| HML × High MKTVOL                                                                                                          |                      |                      |                      |                      | -0.227<br>(-0.88)    | -0.248<br>(-0.93)    |                     |                     |
| HML × High VIX                                                                                                             |                      |                      |                      |                      |                      |                      | -0.086<br>(-0.31)   | -0.145<br>(-0.51)   |
| HML × High MKTILLIQ                                                                                                        |                      |                      |                      |                      | 0.116<br>(0.53)      | 0.034<br>(0.15)      | 0.087<br>(0.34)     | 0.020<br>(0.07)     |
| RMW                                                                                                                        | 0.582***<br>(6.84)   | 0.581***<br>(6.82)   | 0.585***<br>(6.72)   | 0.584***<br>(6.70)   | 0.420**<br>(2.25)    | 0.332*<br>(1.73)     | 0.372**<br>(2.10)   | 0.377**<br>(2.11)   |
| RMW × High SENT                                                                                                            |                      |                      |                      |                      | 0.016<br>(0.10)      |                      | 0.091<br>(0.52)     |                     |
| RMW × High PLS SENT                                                                                                        |                      |                      |                      |                      |                      | 0.179<br>(1.13)      |                     | 0.178<br>(1.06)     |
| RMW × High MKTVOL                                                                                                          |                      |                      |                      |                      | -0.018<br>(-0.10)    | -0.031<br>(-0.17)    |                     |                     |
| RMW × High VIX                                                                                                             |                      |                      |                      |                      |                      |                      | 0.005<br>(0.03)     | -0.079<br>(-0.41)   |
| RMW × High MKTILLIQ                                                                                                        |                      |                      |                      |                      | 0.172<br>(1.17)      | 0.166<br>(1.10)      | 0.201<br>(1.24)     | 0.182<br>(1.15)     |
| CMA                                                                                                                        | 0.733***<br>(6.15)   | 0.731***<br>(6.28)   | 0.715***<br>(5.57)   | 0.712***<br>(5.65)   | -0.307<br>(-1.15)    | -0.002<br>(-0.01)    | -0.050<br>(-0.20)   | 0.282<br>(0.96)     |
| CMA × High SENT                                                                                                            |                      |                      |                      |                      | 0.182<br>(0.83)      |                      | 0.186<br>(0.75)     |                     |
| CMA × High PLS SENT                                                                                                        |                      |                      |                      |                      |                      | -0.237<br>(-0.85)    |                     | -0.336<br>(-1.09)   |
| CMA × High MKTVOL                                                                                                          |                      |                      |                      |                      | 0.878***<br>(3.28)   | 0.930***<br>(3.83)   |                     |                     |
| CMA × High VIX                                                                                                             |                      |                      |                      |                      |                      |                      | 0.671**<br>(2.00)   | 0.713**<br>(2.52)   |
| CMA × High MKTILLIQ                                                                                                        |                      |                      |                      |                      | 0.092<br>(0.32)      | -0.026<br>(-0.10)    | 0.009<br>(0.03)     | -0.038<br>(-0.13)   |
| MOM                                                                                                                        | 0.520***<br>(3.20)   | 0.517***<br>(3.16)   | 0.497***<br>(2.94)   | 0.498***<br>(2.94)   | 0.261<br>(0.80)      | 0.124<br>(0.36)      | 0.603**<br>(2.05)   | 0.367<br>(1.28)     |
| MOM × High SENT                                                                                                            |                      |                      |                      |                      | -0.304<br>(-0.93)    |                      | -0.428<br>(-1.09)   |                     |
| MOM × High PLS SENT                                                                                                        |                      |                      |                      |                      |                      | -0.161<br>(-0.47)    |                     | -0.195<br>(-0.50)   |
| MOM × High MKTVOL                                                                                                          |                      |                      |                      |                      | 0.455<br>(1.26)      | 0.477<br>(1.29)      |                     |                     |
| MOM × High VIX                                                                                                             |                      |                      |                      |                      |                      |                      | -0.191<br>(-0.56)   | -0.050<br>(-0.14)   |
| MOM × High MKTILLIQ                                                                                                        |                      |                      |                      |                      | -0.144<br>(-0.51)    | 0.107<br>(0.37)      | 0.035<br>(0.11)     | 0.318<br>(1.01)     |
| Obs                                                                                                                        | 372                  | 372                  | 335                  | 335                  | 372                  | 372                  | 335                 | 335                 |
| R-squared                                                                                                                  | 0.522                | 0.523                | 0.543                | 0.544                | 0.614                | 0.603                | 0.612               | 0.602               |

| Panel B: Value-Weighted Returns to Investment Strategies Sorted by Risk Loadings Regressed on Lagged Market States |                    |                    |                    |                    |                    |                     |                     |                    |
|--------------------------------------------------------------------------------------------------------------------|--------------------|--------------------|--------------------|--------------------|--------------------|---------------------|---------------------|--------------------|
|                                                                                                                    | Model 1            | Model 2            | Model 3            | Model 4            | Model 5            | Model 6             | Model 7             | Model 8            |
| Constant                                                                                                           | 0.435<br>(0.32)    | 1.257<br>(1.03)    | 0.530<br>(0.36)    | 1.554<br>(1.20)    | 0.962<br>(0.80)    | 1.759<br>(1.54)     | 0.857<br>(0.64)     | 2.125*<br>(1.73)   |
| High SENT                                                                                                          | 1.160*<br>(1.91)   |                    | 1.124*<br>(1.75)   |                    | 0.865<br>(1.26)    |                     | 1.010<br>(1.42)     |                    |
| High PLS SENT                                                                                                      |                    | 0.863<br>(1.25)    |                    | 0.623<br>(0.89)    |                    | 0.559<br>(0.87)     |                     | 0.614<br>(0.94)    |
| High MKTVOL                                                                                                        | 1.066<br>(1.56)    | 1.022<br>(1.50)    |                    |                    | 0.921<br>(1.38)    | 0.901<br>(1.28)     |                     |                    |
| High VIX                                                                                                           |                    |                    | 1.564**<br>(2.28)  | 1.382**<br>(2.06)  |                    |                     | 1.755***<br>(2.60)  | 1.326**<br>(1.98)  |
| High MKTILLIQ                                                                                                      | 1.608**<br>(2.20)  | 1.830**<br>(2.27)  | 1.849**<br>(2.31)  | 2.145**<br>(2.47)  | 1.203*<br>(1.79)   | 1.370*<br>(1.84)    | 1.160<br>(1.55)     | 1.379*<br>(1.71)   |
| DOWN                                                                                                               | -0.874<br>(-1.28)  | -0.844<br>(-1.22)  | -1.152<br>(-1.60)  | -1.092<br>(-1.50)  | -0.602<br>(-0.92)  | -0.595<br>(-0.90)   | -0.977<br>(-1.39)   | -0.801<br>(-1.14)  |
| TERM                                                                                                               | 0.037<br>(0.13)    | -0.137<br>(-0.41)  | -0.001<br>(-0.00)  | -0.207<br>(-0.59)  | -0.021<br>(-0.08)  | -0.097<br>(-0.36)   | -0.103<br>(-0.36)   | -0.227<br>(-0.76)  |
| DEF                                                                                                                | -0.291<br>(-0.30)  | -0.664<br>(-0.70)  | -0.568<br>(-0.55)  | -0.943<br>(-0.98)  | -0.552<br>(-0.55)  | -1.243<br>(-1.07)   | -0.709<br>(-0.68)   | -1.619<br>(-1.37)  |
| MKT                                                                                                                | 0.163<br>(1.51)    | 0.170<br>(1.59)    | 0.203<br>(1.59)    | 0.212*<br>(1.68)   | 0.054<br>(0.31)    | 0.292<br>(1.58)     | -0.057<br>(-0.36)   | 0.202<br>(1.16)    |
| MKT × High SENT                                                                                                    |                    |                    |                    |                    | 0.106<br>(0.55)    |                     | 0.129<br>(0.59)     |                    |
| MKT × High PLS SENT                                                                                                |                    |                    |                    |                    |                    | -0.185<br>(-0.99)   |                     | -0.267<br>(-1.36)  |
| MKT × High MKTVOL                                                                                                  |                    |                    |                    |                    | -0.026<br>(-0.16)  | -0.093<br>(-0.54)   |                     |                    |
| MKT × High VIX                                                                                                     |                    |                    |                    |                    |                    |                     | 0.084<br>(0.47)     | 0.031<br>(0.18)    |
| MKT × High MKTILLIQ                                                                                                |                    |                    |                    |                    | 0.229<br>(1.35)    | 0.142<br>(0.75)     | 0.305<br>(1.51)     | 0.238<br>(1.15)    |
| SMB                                                                                                                | 0.626***<br>(3.82) | 0.632***<br>(3.91) | 0.634***<br>(3.65) | 0.642***<br>(3.73) | 0.447*<br>(1.82)   | 0.185<br>(0.74)     | 0.275<br>(1.00)     | 0.098<br>(0.39)    |
| SMB × High SENT                                                                                                    |                    |                    |                    |                    | -0.019<br>(-0.07)  |                     | 0.101<br>(0.32)     |                    |
| SMB × High PLS SENT                                                                                                |                    |                    |                    |                    |                    | 0.398<br>(1.62)     |                     | 0.425<br>(1.47)    |
| SMB × High MKTVOL                                                                                                  |                    |                    |                    |                    | -0.463*<br>(-1.86) | -0.550**<br>(-2.30) |                     |                    |
| SMB × High VIX                                                                                                     |                    |                    |                    |                    |                    |                     | -0.217<br>(-0.75)   | -0.337<br>(-1.16)  |
| SMB × High MKTILLIQ                                                                                                |                    |                    |                    |                    | 1.024***<br>(3.58) | 1.149***<br>(3.89)  | 0.930***<br>(2.77)  | 1.072***<br>(3.22) |
| HML                                                                                                                | 0.479***<br>(2.92) | 0.489***<br>(2.95) | 0.462***<br>(2.79) | 0.465***<br>(2.77) | 0.252<br>(0.76)    | 0.054<br>(0.17)     | 0.742**<br>(2.45)   | 0.279<br>(0.97)    |
| HML × High SENT                                                                                                    |                    |                    |                    |                    | -0.105<br>(-0.30)  |                     | -0.303<br>(-0.80)   |                    |
| HML × High PLS SENT                                                                                                |                    |                    |                    |                    |                    | 0.347<br>(0.93)     |                     | 0.623*<br>(1.70)   |
| HML × High MKTVOL                                                                                                  |                    |                    |                    |                    | 0.305<br>(0.78)    | 0.254<br>(0.65)     |                     |                    |
| HML × High VIX                                                                                                     |                    |                    |                    |                    |                    |                     | -0.305<br>(-0.86)   | -0.352<br>(-0.93)  |
| HML × High MKTILLIQ                                                                                                |                    |                    |                    |                    | 0.034<br>(0.09)    | -0.045<br>(-0.12)   | 0.066<br>(0.18)     | -0.076<br>(-0.21)  |
| RMW                                                                                                                | 0.013<br>(0.09)    | 0.011<br>(0.08)    | 0.028<br>(0.19)    | 0.030<br>(0.20)    | 0.496<br>(1.65)    | 0.234<br>(0.95)     | 0.858***<br>(2.76)  | 0.488*<br>(1.96)   |
| RMW × High SENT                                                                                                    |                    |                    |                    |                    | -0.380<br>(-1.42)  |                     | -0.509*<br>(-1.84)  |                    |
| RMW × High PLS SENT                                                                                                |                    |                    |                    |                    |                    | -0.045<br>(-0.21)   |                     | -0.094<br>(-0.44)  |
| RMW × High MKTVOL                                                                                                  |                    |                    |                    |                    | -0.133<br>(-0.52)  | -0.040<br>(-0.18)   |                     |                    |
| RMW × High VIX                                                                                                     |                    |                    |                    |                    |                    |                     | -0.571**<br>(-2.04) | -0.402*<br>(-1.70) |
| RMW × High MKTILLIQ                                                                                                |                    |                    |                    |                    | -0.416<br>(-1.33)  | -0.353<br>(-1.24)   | -0.322<br>(-1.02)   | -0.228<br>(-0.77)  |
| CMA                                                                                                                | 0.134<br>(0.57)    | 0.149<br>(0.63)    | 0.179<br>(0.72)    | 0.199<br>(0.78)    | -0.475<br>(-1.24)  | -0.146<br>(-0.35)   | -0.469<br>(-1.23)   | -0.067<br>(-0.16)  |
| CMA × High SENT                                                                                                    |                    |                    |                    |                    | -0.218<br>(-0.63)  |                     | -0.054<br>(-0.14)   |                    |
| CMA × High PLS SENT                                                                                                |                    |                    |                    |                    |                    | -0.519<br>(-1.35)   |                     | -0.616<br>(-1.58)  |
| CMA × High MKTVOL                                                                                                  |                    |                    |                    |                    | 0.168<br>(0.50)    | 0.232<br>(0.70)     |                     |                    |
| CMA × High VIX                                                                                                     |                    |                    |                    |                    |                    |                     | 0.153<br>(0.46)     | 0.254<br>(0.81)    |
| CMA × High MKTILLIQ                                                                                                |                    |                    |                    |                    | 1.379**<br>(2.53)  | 1.157**<br>(2.41)   | 1.499**<br>(2.51)   | 1.332**<br>(2.53)  |
| MOM                                                                                                                | -0.192<br>(-0.62)  | -0.201<br>(-0.64)  | -0.216<br>(-0.65)  | -0.212<br>(-0.63)  | 0.212<br>(0.48)    | 0.626<br>(1.51)     | 0.071<br>(0.16)     | 0.523<br>(1.39)    |
| MOM × High SENT                                                                                                    |                    |                    |                    |                    | 0.367<br>(0.59)    |                     | 0.568<br>(0.86)     |                    |
| MOM × High PLS SENT                                                                                                |                    |                    |                    |                    |                    | -0.354<br>(-0.71)   |                     | -0.513<br>(-1.02)  |
| MOM × High MKTVOL                                                                                                  |                    |                    |                    |                    | -0.789*<br>(-1.74) | -0.970**<br>(-2.13) |                     |                    |
| MOM × High VIX                                                                                                     |                    |                    |                    |                    |                    |                     | -0.596<br>(-1.34)   | -0.624<br>(-1.41)  |
| MOM × High MKTILLIQ                                                                                                |                    |                    |                    |                    | 0.520<br>(1.13)    | 0.558<br>(1.18)     | 0.544<br>(1.18)     | 0.556<br>(1.20)    |
| Obs                                                                                                                | 360                | 360                | 323                | 323                | 360                | 360                 | 323                 | 323                |
| R-squared                                                                                                          | 0.168              | 0.164              | 0.184              | 0.180              | 0.273              | 0.269               | 0.296               | 0.289              |

| Panel C: Value-Weighted Returns to Investment Strategies Sorted by IPCA-Predicted Returns Regressed on Lagged Market States |                    |                    |                    |                    |                   |                      |                   |                     |
|-----------------------------------------------------------------------------------------------------------------------------|--------------------|--------------------|--------------------|--------------------|-------------------|----------------------|-------------------|---------------------|
|                                                                                                                             | Model 1            | Model 2            | Model 3            | Model 4            | Model 5           | Model 6              | Model 7           | Model 8             |
| Constant                                                                                                                    | 0.176<br>(0.36)    | 0.274<br>(0.57)    | 0.084<br>(0.16)    | 0.302<br>(0.59)    | 0.394<br>(0.77)   | 0.239<br>(0.51)      | 0.233<br>(0.42)   | 0.312<br>(0.62)     |
| High SENT                                                                                                                   | 0.158<br>(0.49)    |                    | 0.276<br>(0.82)    |                    | 0.175<br>(0.41)   |                      | 0.186<br>(0.43)   |                     |
| High PLS SENT                                                                                                               |                    | 0.152<br>(0.38)    |                    | 0.226<br>(0.58)    |                   | 0.453<br>(1.10)      |                   | 0.501<br>(1.20)     |
| High MKTVOL                                                                                                                 | 0.142<br>(0.52)    | 0.134<br>(0.49)    |                    |                    | -0.005<br>(-0.02) | -0.090<br>(-0.28)    |                   |                     |
| High VIX                                                                                                                    |                    |                    | 0.302<br>(0.83)    | 0.248<br>(0.70)    |                   |                      | 0.312<br>(0.74)   | 0.191<br>(0.44)     |
| High MKTILLIQ                                                                                                               | 0.130<br>(0.41)    | 0.168<br>(0.47)    | 0.258<br>(0.70)    | 0.345<br>(0.86)    | 0.118<br>(0.30)   | 0.123<br>(0.31)      | 0.203<br>(0.45)   | 0.289<br>(0.64)     |
| DOWN                                                                                                                        | 0.157<br>(0.44)    | 0.159<br>(0.45)    | -0.055<br>(-0.15)  | -0.044<br>(-0.12)  | 0.257<br>(0.67)   | 0.307<br>(0.83)      | 0.137<br>(0.33)   | 0.137<br>(0.34)     |
| TERM                                                                                                                        | -0.006<br>(-0.05)  | -0.035<br>(-0.23)  | -0.037<br>(-0.25)  | -0.097<br>(-0.56)  | -0.018<br>(-0.14) | -0.064<br>(-0.42)    | -0.047<br>(-0.30) | -0.156<br>(-0.90)   |
| DEF                                                                                                                         | 0.204<br>(0.47)    | 0.159<br>(0.36)    | 0.274<br>(0.62)    | 0.197<br>(0.43)    | 0.088<br>(0.19)   | 0.155<br>(0.30)      | 0.128<br>(0.30)   | 0.106<br>(0.19)     |
| MKT                                                                                                                         | 0.048<br>(0.98)    | 0.050<br>(1.01)    | 0.085<br>(1.57)    | 0.087<br>(1.64)    | 0.033<br>(0.37)   | 0.170*<br>(1.78)     | 0.020<br>(0.22)   | 0.183*<br>(1.83)    |
| MKT × High SENT                                                                                                             |                    |                    |                    |                    | -0.016<br>(-0.17) |                      | 0.080<br>(0.80)   |                     |
| MKT × High PLS SENT                                                                                                         |                    |                    |                    |                    |                   | -0.261***<br>(-2.94) |                   | -0.225**<br>(-2.28) |
| MKT × High MKTVOL                                                                                                           |                    |                    |                    |                    | 0.071<br>(0.79)   | 0.122<br>(1.40)      |                   |                     |
| MKT × High VIX                                                                                                              |                    |                    |                    |                    |                   |                      | 0.086<br>(0.78)   | 0.103<br>(0.97)     |
| MKT × High MKTILLIQ                                                                                                         |                    |                    |                    |                    | -0.049<br>(-0.53) | -0.051<br>(-0.52)    | -0.081<br>(-0.75) | -0.039<br>(-0.36)   |
| SMB                                                                                                                         | 0.164**<br>(2.05)  | 0.164**<br>(2.06)  | 0.173**<br>(2.02)  | 0.174**<br>(2.03)  | 0.166<br>(1.05)   | 0.074<br>(0.49)      | 0.084<br>(0.58)   | 0.027<br>(0.21)     |
| SMB × High SENT                                                                                                             |                    |                    |                    |                    | -0.146<br>(-0.87) |                      | -0.092<br>(-0.53) |                     |
| SMB × High PLS SENT                                                                                                         |                    |                    |                    |                    |                   | -0.036<br>(-0.21)    |                   | -0.063<br>(-0.35)   |
| SMB × High MKTVOL                                                                                                           |                    |                    |                    |                    | 0.013<br>(0.08)   | 0.016<br>(0.11)      |                   |                     |
| SMB × High VIX                                                                                                              |                    |                    |                    |                    |                   |                      | 0.105<br>(0.66)   | 0.123<br>(0.77)     |
| SMB × High MKTILLIQ                                                                                                         |                    |                    |                    |                    | 0.152<br>(0.87)   | 0.182<br>(1.06)      | 0.179<br>(0.95)   | 0.211<br>(1.15)     |
| HML                                                                                                                         | 0.067<br>(0.74)    | 0.068<br>(0.76)    | 0.014<br>(0.16)    | 0.015<br>(0.17)    | 0.072<br>(0.35)   | 0.142<br>(0.78)      | 0.205<br>(1.19)   | 0.200<br>(1.23)     |
| HML × High SENT                                                                                                             |                    |                    |                    |                    | 0.021<br>(0.12)   |                      | -0.138<br>(-0.77) |                     |
| HML × High PLS SENT                                                                                                         |                    |                    |                    |                    |                   | -0.085<br>(-0.45)    |                   | -0.026<br>(-0.12)   |
| HML × High MKTVOL                                                                                                           |                    |                    |                    |                    | 0.034<br>(0.19)   | 0.087<br>(0.45)      |                   |                     |
| HML × High VIX                                                                                                              |                    |                    |                    |                    |                   |                      | -0.056<br>(-0.28) | -0.031<br>(-0.15)   |
| HML × High MKTILLIQ                                                                                                         |                    |                    |                    |                    | -0.139<br>(-0.72) | -0.119<br>(-0.65)    | -0.206<br>(-0.98) | -0.220<br>(-1.04)   |
| RMW                                                                                                                         | 0.368***<br>(5.53) | 0.367***<br>(5.48) | 0.374***<br>(5.31) | 0.374***<br>(5.29) | 0.311**<br>(2.53) | 0.360***<br>(3.44)   | 0.300**<br>(2.35) | 0.349***<br>(3.30)  |
| RMW × High SENT                                                                                                             |                    |                    |                    |                    | 0.099<br>(0.89)   |                      | 0.104<br>(0.82)   |                     |
| RMW × High PLS SENT                                                                                                         |                    |                    |                    |                    |                   | 0.072<br>(0.71)      |                   | 0.078<br>(0.74)     |
| RMW × High MKTVOL                                                                                                           |                    |                    |                    |                    | -0.120<br>(-1.30) | -0.121<br>(-1.36)    |                   |                     |
| RMW × High VIX                                                                                                              |                    |                    |                    |                    |                   |                      | -0.114<br>(-1.09) | -0.124<br>(-1.29)   |
| RMW × High MKTILLIQ                                                                                                         |                    |                    |                    |                    | 0.160<br>(1.48)   | 0.090<br>(0.92)      | 0.174<br>(1.46)   | 0.110<br>(0.99)     |
| CMA                                                                                                                         | 0.004<br>(0.04)    | 0.005<br>(0.05)    | 0.030<br>(0.29)    | 0.033<br>(0.32)    | -0.239<br>(-1.00) | -0.060<br>(-0.23)    | -0.086<br>(-0.43) | 0.102<br>(0.44)     |
| CMA × High SENT                                                                                                             |                    |                    |                    |                    | -0.248<br>(-1.15) |                      | -0.111<br>(-0.51) |                     |
| CMA × High PLS SENT                                                                                                         |                    |                    |                    |                    |                   | -0.443*<br>(-1.76)   |                   | -0.478*<br>(-1.76)  |
| CMA × High MKTVOL                                                                                                           |                    |                    |                    |                    | 0.251<br>(1.19)   | 0.313<br>(1.57)      |                   |                     |
| CMA × High VIX                                                                                                              |                    |                    |                    |                    |                   |                      | 0.085<br>(0.35)   | 0.203<br>(0.89)     |
| CMA × High MKTILLIQ                                                                                                         |                    |                    |                    |                    | 0.079<br>(0.35)   | 0.068<br>(0.32)      | 0.003<br>(0.01)   | 0.101<br>(0.43)     |
| MOM                                                                                                                         | 0.262**<br>(1.98)  | 0.260*<br>(1.96)   | 0.305**<br>(2.14)  | 0.306**<br>(2.15)  | -0.237<br>(-0.96) | -0.054<br>(-0.22)    | -0.154<br>(-0.65) | 0.087<br>(0.37)     |
| MOM × High SENT                                                                                                             |                    |                    |                    |                    | 0.208<br>(0.77)   |                      | 0.394<br>(1.29)   |                     |
| MOM × High PLS SENT                                                                                                         |                    |                    |                    |                    |                   | -0.081<br>(-0.33)    |                   | -0.201<br>(-0.73)   |
| MOM × High MKTVOL                                                                                                           |                    |                    |                    |                    | 0.499*<br>(1.87)  | 0.453<br>(1.61)      |                   |                     |
| MOM × High VIX                                                                                                              |                    |                    |                    |                    |                   |                      | 0.245<br>(0.82)   | 0.282<br>(0.98)     |
| MOM × High MKTILLIQ                                                                                                         |                    |                    |                    |                    | 0.034<br>(0.12)   | 0.107<br>(0.38)      | 0.150<br>(0.49)   | 0.258<br>(0.84)     |
| Obs                                                                                                                         | 372                | 372                | 335                | 335                | 372               | 372                  | 335               | 335                 |
| R-squared                                                                                                                   | 0.296              | 0.296              | 0.317              | 0.316              | 0.340             | 0.351                | 0.349             | 0.356               |

| Panel D: Value-Weighted Returns to Investment Strategies Sorted by CA2-Predicted Returns Regressed on Lagged Market States |                    |                    |                    |                    |                    |                    |                     |                      |
|----------------------------------------------------------------------------------------------------------------------------|--------------------|--------------------|--------------------|--------------------|--------------------|--------------------|---------------------|----------------------|
|                                                                                                                            | Model 1            | Model 2            | Model 3            | Model 4            | Model 5            | Model 6            | Model 7             | Model 8              |
| Constant                                                                                                                   | -0.827<br>(-0.81)  | -0.511<br>(-0.58)  | -0.745<br>(-0.67)  | -0.276<br>(-0.30)  | 0.192<br>(0.21)    | 0.192<br>(0.24)    | 0.300<br>(0.29)     | 0.407<br>(0.47)      |
| High SENT                                                                                                                  | 0.463<br>(1.03)    |                    | 0.488<br>(1.00)    |                    | -0.011<br>(-0.02)  |                    | 0.010<br>(0.02)     |                      |
| High PLS SENT                                                                                                              |                    | 0.385<br>(0.72)    |                    | 0.193<br>(0.35)    |                    | 0.034<br>(0.06)    |                     | 0.058<br>(0.10)      |
| High MKTVOL                                                                                                                | 0.077<br>(0.13)    | 0.058<br>(0.10)    |                    |                    | -0.265<br>(-0.49)  | -0.238<br>(-0.42)  |                     |                      |
| High VIX                                                                                                                   |                    |                    | 0.190<br>(0.34)    | 0.126<br>(0.23)    |                    |                    | 0.307<br>(0.55)     | 0.364<br>(0.61)      |
| High MKTILLIQ                                                                                                              | 0.490<br>(0.79)    | 0.589<br>(0.90)    | 0.821<br>(1.24)    | 0.938<br>(1.34)    | 0.267<br>(0.51)    | 0.251<br>(0.47)    | 0.281<br>(0.49)     | 0.359<br>(0.64)      |
| DOWN                                                                                                                       | -0.963*<br>(-1.66) | -0.955<br>(-1.63)  | -1.114*<br>(-1.84) | -1.081*<br>(-1.78) | -0.588<br>(-1.23)  | -0.699<br>(-1.38)  | -0.711<br>(-1.35)   | -0.848<br>(-1.52)    |
| TERM                                                                                                                       | 0.262<br>(1.25)    | 0.187<br>(0.78)    | 0.208<br>(0.90)    | 0.129<br>(0.52)    | 0.124<br>(0.73)    | 0.084<br>(0.43)    | 0.030<br>(0.16)     | -0.036<br>(-0.17)    |
| DEF                                                                                                                        | 0.777<br>(0.81)    | 0.632<br>(0.68)    | 0.784<br>(0.79)    | 0.607<br>(0.64)    | 0.152<br>(0.17)    | 0.266<br>(0.27)    | 0.075<br>(0.08)     | 0.082<br>(0.08)      |
| MKT                                                                                                                        | 0.022<br>(0.27)    | 0.025<br>(0.31)    | 0.049<br>(0.48)    | 0.052<br>(0.51)    | -0.107<br>(-0.59)  | -0.083<br>(-0.51)  | -0.070<br>(-0.38)   | -0.018<br>(-0.10)    |
| MKT × High SENT                                                                                                            |                    |                    |                    |                    | 0.133<br>(0.91)    |                    | 0.128<br>(0.74)     |                      |
| MKT × High PLS SENT                                                                                                        |                    |                    |                    |                    |                    | 0.057<br>(0.39)    |                     | -0.037<br>(-0.22)    |
| MKT × High MKTVOL                                                                                                          |                    |                    |                    |                    | 0.052<br>(0.34)    | 0.033<br>(0.22)    |                     |                      |
| MKT × High VIX                                                                                                             |                    |                    |                    |                    |                    |                    | -0.112<br>(-0.60)   | -0.089<br>(-0.49)    |
| MKT × High MKTILLIQ                                                                                                        |                    |                    |                    |                    | 0.001<br>(0.01)    | 0.027<br>(0.18)    | 0.142<br>(0.82)     | 0.145<br>(0.88)      |
| SMB                                                                                                                        | 0.346**<br>(2.46)  | 0.348**<br>(2.46)  | 0.325**<br>(2.23)  | 0.329**<br>(2.25)  | 0.089<br>(0.45)    | -0.062<br>(-0.34)  | 0.078<br>(0.38)     | 0.001<br>(0.00)      |
| SMB × High SENT                                                                                                            |                    |                    |                    |                    | -0.233<br>(-1.15)  |                    | -0.169<br>(-0.77)   |                      |
| SMB × High PLS SENT                                                                                                        |                    |                    |                    |                    |                    | -0.002<br>(-0.01)  |                     | -0.113<br>(-0.55)    |
| SMB × High MKTVOL                                                                                                          |                    |                    |                    |                    | 0.099<br>(0.46)    | 0.095<br>(0.44)    |                     |                      |
| SMB × High VIX                                                                                                             |                    |                    |                    |                    |                    |                    | 0.066<br>(0.30)     | 0.106<br>(0.50)      |
| SMB × High MKTILLIQ                                                                                                        |                    |                    |                    |                    | 0.821***<br>(2.94) | 0.839***<br>(2.98) | 0.805***<br>(2.85)  | 0.829***<br>(3.01)   |
| HML                                                                                                                        | 0.201<br>(1.42)    | 0.206<br>(1.45)    | 0.172<br>(1.18)    | 0.175<br>(1.19)    | 0.306<br>(1.17)    | 0.430*<br>(1.68)   | 0.279<br>(1.02)     | 0.389<br>(1.57)      |
| HML × High SENT                                                                                                            |                    |                    |                    |                    | 0.270<br>(1.00)    |                    | 0.303<br>(1.02)     |                      |
| HML × High PLS SENT                                                                                                        |                    |                    |                    |                    |                    | 0.151<br>(0.59)    |                     | 0.312<br>(1.13)      |
| HML × High MKTVOL                                                                                                          |                    |                    |                    |                    | -0.516*<br>(-1.82) | -0.535*<br>(-1.91) |                     |                      |
| HML × High VIX                                                                                                             |                    |                    |                    |                    |                    |                    | -0.362<br>(-1.24)   | -0.442<br>(-1.54)    |
| HML × High MKTILLIQ                                                                                                        |                    |                    |                    |                    | 0.151<br>(0.57)    | 0.129<br>(0.47)    | 0.023<br>(0.09)     | -0.057<br>(-0.20)    |
| RMW                                                                                                                        | 0.333***<br>(4.04) | 0.333***<br>(4.05) | 0.344***<br>(3.99) | 0.346***<br>(3.99) | 0.610***<br>(3.16) | 0.533***<br>(3.23) | 0.815***<br>(3.54)  | 0.738***<br>(4.14)   |
| RMW × High SENT                                                                                                            |                    |                    |                    |                    | -0.053<br>(-0.32)  |                    | -0.101<br>(-0.57)   |                      |
| RMW × High PLS SENT                                                                                                        |                    |                    |                    |                    |                    | 0.144<br>(1.11)    |                     | 0.143<br>(1.14)      |
| RMW × High MKTVOL                                                                                                          |                    |                    |                    |                    | -0.183<br>(-1.02)  | -0.189<br>(-1.15)  |                     |                      |
| RMW × High VIX                                                                                                             |                    |                    |                    |                    |                    |                    | -0.431**<br>(-1.98) | -0.465***<br>(-2.69) |
| RMW × High MKTILLIQ                                                                                                        |                    |                    |                    |                    | -0.287<br>(-1.64)  | -0.290*<br>(-1.86) | -0.244<br>(-1.44)   | -0.246<br>(-1.61)    |
| CMA                                                                                                                        | 0.127<br>(0.60)    | 0.133<br>(0.62)    | 0.158<br>(0.70)    | 0.168<br>(0.75)    | -0.458<br>(-1.55)  | -0.423<br>(-1.29)  | -0.175<br>(-0.57)   | -0.019<br>(-0.05)    |
| CMA × High SENT                                                                                                            |                    |                    |                    |                    | 0.064<br>(0.21)    |                    | 0.089<br>(0.28)     |                      |
| CMA × High PLS SENT                                                                                                        |                    |                    |                    |                    |                    | 0.137<br>(0.41)    |                     | -0.131<br>(-0.40)    |
| CMA × High MKTVOL                                                                                                          |                    |                    |                    |                    | 0.458<br>(1.46)    | 0.533*<br>(1.71)   |                     |                      |
| CMA × High VIX                                                                                                             |                    |                    |                    |                    |                    |                    | 0.005<br>(0.01)     | 0.158<br>(0.46)      |
| CMA × High MKTILLIQ                                                                                                        |                    |                    |                    |                    | 0.654<br>(1.50)    | 0.628<br>(1.60)    | 0.863**<br>(1.98)   | 0.836**<br>(2.21)    |
| MOM                                                                                                                        | 0.364<br>(1.38)    | 0.361<br>(1.35)    | 0.358<br>(1.26)    | 0.359<br>(1.27)    | -0.012<br>(-0.03)  | 0.282<br>(0.73)    | 0.263<br>(0.55)     | 0.489<br>(1.20)      |
| MOM × High SENT                                                                                                            |                    |                    |                    |                    | -0.205<br>(-0.43)  |                    | -0.325<br>(-0.63)   |                      |
| MOM × High PLS SENT                                                                                                        |                    |                    |                    |                    |                    | -0.753*<br>(-1.75) |                     | -1.102**<br>(-2.49)  |
| MOM × High MKTVOL                                                                                                          |                    |                    |                    |                    | 0.280<br>(0.62)    | 0.190<br>(0.45)    |                     |                      |
| MOM × High VIX                                                                                                             |                    |                    |                    |                    |                    |                    | -0.263<br>(-0.58)   | -0.086<br>(-0.21)    |
| MOM × High MKTILLIQ                                                                                                        |                    |                    |                    |                    | 0.713*<br>(1.67)   | 0.703*<br>(1.68)   | 1.091**<br>(2.53)   | 1.143***<br>(2.96)   |
| Obs                                                                                                                        | 360                | 360                | 324                | 324                | 360                | 360                | 324                 | 324                  |
| R-squared                                                                                                                  | 0.185              | 0.185              | 0.189              | 0.187              | 0.284              | 0.290              | 0.297               | 0.307                |

**Table IA9: Performance of Machine Learning Portfolios and their Attribution: IPCA and Conditional Autoencoder**

This table reports the monthly returns from the unconditional strategy (WML) and its decomposition into intra-industry ( $WML^{INTRA}$ ) and inter-industry ( $WML^{INTER}$ ) return components, as depicted in Equation (5). In Panel A1, we report the returns for WML, where the strategy takes long (short) positions in the winner (loser) stocks that are expected to outperform (underperform) the market according to the IPCA-predicted returns (Kelly, Pruitt, and Su 2019). In Panel A2, we report the returns for  $WML^{INTRA}$ , where the strategy takes long (short) positions in the stocks that are expected to outperform (underperform) the industry portfolio.  $H^{INTRA}$  and  $H$  are the scaling factors for the unconditional and intra-industry strategies. Panel A3 reports the return for  $WML^{INTER}$ , where the strategy takes long (short) positions in the industry portfolios that are expected to outperform (underperform) the market portfolio.  $H^{INTER}$  is the scaling factor for the inter-industry strategy. Portfolio returns are further adjusted by the Fama-French 6-factor model (FF6). We report the results for the full sample as well as subsamples that exclude microcaps, nonrated firms, and credit rating downgrades. Panel B reports similar statistics when portfolios are sorted according to the CA2-predicted returns (Gu, Kelly, and Xiu 2021). Both IPCA and CA2 impose a zero-alpha restriction. Newey-West adjusted t-statistics are shown in parentheses. Numbers with “\*”, “\*\*”, and “\*\*\*” are significant at the 10%, 5%, and 1% levels, respectively.

| Panel A: Returns to Investment Strategies Sorted by IPCA-Predicted Returns |                     |                      |                     |                      |                      |                      |                    |                    |
|----------------------------------------------------------------------------|---------------------|----------------------|---------------------|----------------------|----------------------|----------------------|--------------------|--------------------|
| Rank                                                                       | Full Sample         |                      | Nonmicrocaps        |                      | Credit Rating Sample |                      | Nondowngrades      |                    |
|                                                                            | Return              | FF6                  | Return              | FF6                  | Return               | FF6                  | Return             | FF6                |
| <b>Panel A1: Unconditional Payoff</b>                                      |                     |                      |                     |                      |                      |                      |                    |                    |
| Loser                                                                      | 0.072<br>(0.21)     | -0.642***<br>(-4.83) | 0.383<br>(1.23)     | -0.460***<br>(-5.37) | 0.400<br>(1.19)      | -0.510***<br>(-4.25) | 1.011***<br>(3.56) | 0.023<br>(0.21)    |
| Winner                                                                     | 2.019***<br>(6.02)  | 1.216***<br>(8.56)   | 1.451***<br>(5.19)  | 0.365***<br>(6.40)   | 1.432***<br>(4.69)   | 0.216**<br>(2.50)    | 1.716***<br>(6.47) | 0.466***<br>(6.10) |
| WML                                                                        | 1.947***<br>(14.24) | 1.858***<br>(15.11)  | 1.067***<br>(8.15)  | 0.825***<br>(8.02)   | 1.032***<br>(7.70)   | 0.726***<br>(5.84)   | 0.705***<br>(5.83) | 0.443***<br>(4.39) |
| <b>Panel A2: Intra-Industry Payoff</b>                                     |                     |                      |                     |                      |                      |                      |                    |                    |
| Loser                                                                      | 0.160<br>(0.47)     | -0.611***<br>(-5.04) | 0.426<br>(1.38)     | -0.489***<br>(-6.86) | 0.524<br>(1.64)      | -0.530***<br>(-5.04) | 1.041***<br>(3.74) | -0.063<br>(-0.65)  |
| Winner                                                                     | 1.951***<br>(5.93)  | 1.208***<br>(8.03)   | 1.408***<br>(5.11)  | 0.392***<br>(6.47)   | 1.363***<br>(4.25)   | 0.258***<br>(2.80)   | 1.721***<br>(6.37) | 0.561***<br>(6.68) |
| $WML^{INTRA}$                                                              | 1.791***<br>(15.91) | 1.819***<br>(15.69)  | 0.982***<br>(10.09) | 0.881***<br>(9.96)   | 0.839***<br>(9.46)   | 0.788***<br>(7.79)   | 0.681***<br>(8.56) | 0.623***<br>(7.13) |
| $WML^{INTRA} \times H^{INTRA}/H$                                           | 1.609***<br>(15.90) | 1.636***<br>(15.65)  | 0.846***<br>(10.11) | 0.761***<br>(9.97)   | 0.691***<br>(9.45)   | 0.651***<br>(7.77)   | 0.554***<br>(8.59) | 0.508***<br>(7.15) |
| <b>Panel A3: Inter-Industry Payoff</b>                                     |                     |                      |                     |                      |                      |                      |                    |                    |
| Loser                                                                      | 0.608*<br>(1.77)    | -0.033<br>(-0.20)    | 0.721**<br>(2.36)   | -0.108<br>(-0.95)    | 0.602*<br>(1.72)     | -0.233*<br>(-1.80)   | 1.207***<br>(4.20) | 0.263**<br>(2.16)  |
| Winner                                                                     | 1.400***<br>(4.02)  | 0.462***<br>(3.58)   | 1.190***<br>(4.06)  | 0.031<br>(0.47)      | 1.204***<br>(4.08)   | -0.090<br>(-1.01)    | 1.463***<br>(5.55) | 0.156**<br>(2.02)  |
| $WML^{INTER}$                                                              | 0.791***<br>(4.38)  | 0.495***<br>(3.52)   | 0.469***<br>(2.76)  | 0.138<br>(1.06)      | 0.601***<br>(3.57)   | 0.143<br>(1.01)      | 0.257*<br>(1.84)   | -0.107<br>(-0.86)  |
| $WML^{INTER} \times H^{INTER}/H$                                           | 0.338***<br>(4.34)  | 0.222***<br>(3.56)   | 0.221***<br>(2.66)  | 0.064<br>(0.98)      | 0.341***<br>(3.59)   | 0.075<br>(0.89)      | 0.151*<br>(1.87)   | -0.065<br>(-0.90)  |

Table IA9—Continued

| Panel B: Returns to Investment Strategies Sorted by CA2-Predicted Returns |                    |                     |                    |                      |                      |                      |                    |                    |
|---------------------------------------------------------------------------|--------------------|---------------------|--------------------|----------------------|----------------------|----------------------|--------------------|--------------------|
| Rank                                                                      | Full Sample        |                     | Nonmicrocaps       |                      | Credit Rating Sample |                      | Nondowngrades      |                    |
|                                                                           | Return             | FF6                 | Return             | FF6                  | Return               | FF6                  | Return             | FF6                |
| <b>Panel B1: Unconditional Payoff</b>                                     |                    |                     |                    |                      |                      |                      |                    |                    |
| Loser                                                                     | 0.206<br>(0.48)    | -0.322**<br>(-2.18) | 0.299<br>(0.74)    | -0.297***<br>(-3.01) | 0.086<br>(0.19)      | -0.663***<br>(-4.25) | 1.178***<br>(3.31) | 0.299**<br>(2.24)  |
| Winner                                                                    | 1.863***<br>(4.22) | 1.348***<br>(4.51)  | 1.243***<br>(4.32) | 0.138**<br>(2.01)    | 1.194***<br>(3.34)   | 0.040<br>(0.30)      | 1.616***<br>(5.48) | 0.393***<br>(3.81) |
| WML                                                                       | 1.657***<br>(8.91) | 1.670***<br>(6.96)  | 0.944***<br>(4.51) | 0.436***<br>(3.47)   | 1.107***<br>(4.73)   | 0.703***<br>(3.88)   | 0.438**<br>(2.40)  | 0.094<br>(0.68)    |
| <b>Panel B2: Intra-Industry Payoff</b>                                    |                    |                     |                    |                      |                      |                      |                    |                    |
| Loser                                                                     | 0.266<br>(0.61)    | -0.320**<br>(-2.28) | 0.348<br>(0.88)    | -0.363***<br>(-4.73) | 0.263<br>(0.59)      | -0.603***<br>(-4.06) | 1.217***<br>(3.49) | 0.255*<br>(1.89)   |
| Winner                                                                    | 1.815***<br>(4.06) | 1.363***<br>(4.51)  | 1.187***<br>(4.09) | 0.172***<br>(2.77)   | 1.099***<br>(2.94)   | 0.046<br>(0.33)      | 1.588***<br>(5.34) | 0.450***<br>(4.24) |
| WML <sup>INTRA</sup>                                                      | 1.550***<br>(9.45) | 1.684***<br>(7.41)  | 0.838***<br>(5.17) | 0.535***<br>(5.75)   | 0.835***<br>(4.48)   | 0.649***<br>(4.04)   | 0.371**<br>(2.57)  | 0.194<br>(1.47)    |
| WML <sup>INTRA</sup> ×<br>H <sup>INTRA</sup> /H                           | 1.467***<br>(9.52) | 1.598***<br>(7.52)  | 0.739***<br>(5.25) | 0.478***<br>(5.83)   | 0.724***<br>(4.61)   | 0.569***<br>(4.17)   | 0.327***<br>(2.76) | 0.184*<br>(1.68)   |
| <b>Panel B3: Inter-Industry Payoff</b>                                    |                    |                     |                    |                      |                      |                      |                    |                    |
| Loser                                                                     | 0.655*<br>(1.84)   | 0.128<br>(0.81)     | 0.638*<br>(1.92)   | 0.006<br>(0.05)      | 0.399<br>(1.01)      | -0.378**<br>(-2.34)  | 1.193***<br>(3.80) | 0.307**<br>(2.46)  |
| Winner                                                                    | 1.232***<br>(3.63) | 0.372**<br>(2.36)   | 1.054***<br>(3.79) | -0.054<br>(-0.70)    | 1.095***<br>(3.54)   | -0.146<br>(-1.44)    | 1.392***<br>(5.09) | 0.139<br>(1.47)    |
| WML <sup>INTER</sup>                                                      | 0.578***<br>(2.84) | 0.244<br>(1.41)     | 0.416**<br>(2.17)  | -0.060<br>(-0.39)    | 0.697***<br>(3.19)   | 0.232<br>(1.25)      | 0.198<br>(1.22)    | -0.168<br>(-1.26)  |
| WML <sup>INTER</sup> ×<br>H <sup>INTER</sup> /H                           | 0.190**<br>(2.53)  | 0.072<br>(1.09)     | 0.205**<br>(2.11)  | -0.043<br>(-0.53)    | 0.383***<br>(3.17)   | 0.134<br>(1.30)      | 0.111<br>(1.23)    | -0.090<br>(-1.28)  |
